# Supplementary material for: How many infants may have died in low-income and middle-income countries in 2020 due to the economic contraction accompanying the COVID-19 pandemic? Mortality projections based on forecasted declines in economic growth
Source: PubMed Central journal article supplement — BMJ Open. 2021 Aug 11;11(8):e050551. doi: 10.1136/bmjopen-2021-050551 (PMC8413467; doi:10.1136/bmjopen-2021-050551), 2021-08-11
Supplement: bmjopen-2021-050551.draft_revisions.pdf [file bmjopen-2021-050551.draft_revisions.pdf]

# BMJ Open

BMJ Open is committed to open peer review. As part of this commitment we make the peer review history of every article we publish publicly available.

When an article is published we post the peer reviewers' comments and the authors' responses online. We also post the versions of the paper that were used during peer review. These are the versions that the peer review comments apply to.

The versions of the paper that follow are the versions that were submitted during the peer review process. They are not the versions of record or the final published versions. They should not be cited or distributed as the published version of this manuscript.

BMJ Open is an open access journal and the full, final, typeset and author-corrected version of record of the manuscript is available on our site with no access controls, subscription charges or pay-per-view fees (<http://bmjopen.bmj.com>).

If you have any questions on BMJ Open's open peer review process please email [info.bmjopen@bmj.com](mailto:info.bmjopen@bmj.com)

# BMJ Open

## Projecting excess infant mortality in low- and middle-income countries during the COVID-19 pandemic based on forecasted declines in economic growth

|                               |                                                                                                                                                |
|-------------------------------|------------------------------------------------------------------------------------------------------------------------------------------------|
| Journal:                      | <i>BMJ Open</i>                                                                                                                                |
| Manuscript ID                 | bmjopen-2021-050551                                                                                                                            |
| Article Type:                 | Original research                                                                                                                              |
| Date Submitted by the Author: | 22-Feb-2021                                                                                                                                    |
| Complete List of Authors:     | Shapira, Gil; World Bank, Development Research Group<br>de Walque, Damien; World Bank<br>Friedman, Jed; World Bank, Development Research Group |
| Keywords:                     | COVID-19, HEALTH ECONOMICS, Health policy < HEALTH SERVICES<br>ADMINISTRATION & MANAGEMENT                                                     |
|                               |                                                                                                                                                |

SCHOLARONE™  
Manuscripts

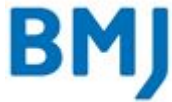

I, the Submitting Author has the right to grant and does grant on behalf of all authors of the Work (as defined in the below author licence), an exclusive licence and/or a non-exclusive licence for contributions from authors who are: i) UK Crown employees; ii) where BMJ has agreed a CC-BY licence shall apply, and/or iii) in accordance with the terms applicable for US Federal Government officers or employees acting as part of their official duties; on a worldwide, perpetual, irrevocable, royalty-free basis to BMJ Publishing Group Ltd ("BMJ") its licensees and where the relevant Journal is co-owned by BMJ to the co-owners of the Journal, to publish the Work in this journal and any other BMJ products and to exploit all rights, as set out in our [licence](#).

The Submitting Author accepts and understands that any supply made under these terms is made by BMJ to the Submitting Author unless you are acting as an employee on behalf of your employer or a postgraduate student of an affiliated institution which is paying any applicable article publishing charge ("APC") for Open Access articles. Where the Submitting Author wishes to make the Work available on an Open Access basis (and intends to pay the relevant APC), the terms of reuse of such Open Access shall be governed by a Creative Commons licence – details of these licences and which [Creative Commons](#) licence will apply to this Work are set out in our licence referred to above.

Other than as permitted in any relevant BMJ Author's Self Archiving Policies, I confirm this Work has not been accepted for publication elsewhere, is not being considered for publication elsewhere and does not duplicate material already published. I confirm all authors consent to publication of this Work and authorise the granting of this licence.

# Projecting excess infant mortality in low- and middle-income countries during the COVID-19 pandemic based on forecasted declines in economic growth

Gil Shapira, PhD. Development Research Group, World Bank.

Damien de Walque, PhD. Development Research Group, World Bank.

Jed Friedman, PhD. Development Research Group, World Bank.

## Abstract

**Objectives:** While COVID-19 has a relatively small direct impact on infant mortality, the pandemic is expected to indirectly increase mortality of this vulnerable group, particularly in low- and middle-income countries, through its effects on the economy and health system performance. Previous studies projected indirect mortality by modelling how hypothesized disruptions in health services will affect health outcomes. We provide alternative projections, relying on modelling of the relationship between aggregate income shocks and mortality.

**Design:** We construct a sample of 5.2 million births by pooling retrospective birth histories reported by women in Demographic and Health Surveys conducted in 83 low- and middle-income countries between 1985 and 2018. We employ regression models with country-specific fixed-effects and flexible time trends to estimate the impact of GDP per capita on infant mortality rate. We then use growth projections by the International Monetary Fund to predict the effect of the economic downturn in 2020 on infant mortality.

**Results:** We estimate 267,208 (137,341-397,075) excess infant deaths in 128 countries, corresponding to a 6.8% increase in the total number of infant deaths expected in 2020.

**Conclusions:** The findings underscore the vulnerability of infants to the negative income shocks such as those imposed by the COVID-19 pandemic. While efforts towards prevention and treatment of COVID-19 remain paramount, the global community should also strengthen social safety nets and assure continuity of essential health services.

## Strengths and limitations of this study

- Our study highlights the impact of the decline in economic growth induced by the COVID-19 pandemic on all-cause infant mortality, an overlooked consequence of the crisis, and adopts rigorous methods to provide mortality projections.
- In comparison to previous projections of mortality during the pandemic that are based on assumptions regarding magnitudes of health service disruptions, our estimates account for additional mechanisms, mainly increased household poverty.
- Our estimates may represent a lower bound of the actual excess mortality if the current economic downturn is accompanied by larger disruptions to provision of essential health services relative to previous downturns.
- We estimate the short-term impact of GDP fluctuations on mortality while longer-term implications for mortality and other adverse outcomes might also exist.

1  
2  
3  
4  
5  
6  
7  
8  
9  
10  
11  
12  
13  
14  
15  
16  
17  
18  
19  
20  
21  
22  
23  
24  
25  
26  
27  
28  
29  
30  
31  
32  
33  
34  
35  
36  
37  
38  
39  
40  
41  
42  
43  
44  
45  
46  
47  
48  
49  
50  
51  
52  
53  
54  
55  
56  
57  
58  
59  
60

- The analysis ascribes the difference between October 2019 and October 2020 economic growth projections for 2020 solely to the pandemic, even though some countries have also experienced other shocks, such as natural disasters or political crises.

For peer review only

## Introduction

Reducing mortality risk in the wake of the COVID-19 pandemic is a paramount public concern. While direct mortality risk as a result of COVID-19 infection has garnered the majority of attention in global media and policy discussions, indirect mortality may be substantial. Health and social policies should not lose sight of excess indirect mortality caused by such factors as the interruption of essential health services and the general economic downturn brought on by the pandemic. This study attempts to quantify the expected indirect mortality over the pandemic period for one especially vulnerable sub-population – infants – by modeling the impact of projected economic decline on the likelihood of infant survival.

Studies from diverse settings find negligible direct mortality rates for children and infants due to COVID-19 (1). However, stringent containment measures and the ensuing economic downturn, as well as the need to reallocate health system resources towards pandemic response, have shifted many social determinants of mortality such as the ability to afford nutritious foods and to access essential health care. Unlike economic crises in high income countries, which appear to lower mortality (2), economic crises in low-income countries generally increase mortality among vulnerable groups, namely young children and the elderly. Earlier studies have documented a robust relationship between short-term fluctuation in aggregate income and all-cause infant mortality in low- and middle-income countries (3) (4) (5) (6) (7) (8).

At the very start of the COVID-19 pandemic, modelling exercises predicted that the interruption of essential health services will be severe (9) (10) (11) (12) (13) and perhaps the world will experience 250,000 to 1.15 million young child deaths (14) in the first six months of the pandemic. Recent studies indicate that barriers to access essential health care in low- and middle-income are not just a theoretical concern documenting, for example, disruptions in immunization services in Pakistan and Sierra Leone (15) (16), and access to primary care in rural South Africa (17). At the same time, the global economy is expected to contract 4.9% in the first year of the pandemic (18) and the global poverty count is projected to increase by 120 million people (19). This economic decline creates food insecurity (20) and lowers the affordability among vulnerable households of key goods and services necessary for child survival.

In this study, we estimate the impact of the economic downturn on infant mortality by modelling the relationship between GDP fluctuations and infant mortality, following the approach of Baird et al (2011) (5). We link GDP per capita data to 5.2 million retrospective birth histories reported in 83 Demographic and Health Surveys (DHS) conducted in low- and middle-income countries between 1985 and 2017. Then, we use growth projections by International Monetary Fund (IMF) World Economic Outlook (WEO) to predict the effect of the economic downturn in 2020 on infant mortality.

## Data and Methods

To estimate the impact of GDP per capita on infant mortality rate, we rely on two sources of data. Data on GDP per capita is taken from the World Development Indicators. We use values adjusted for purchasing power parity, corresponding to 2011 US dollars. Data on infant mortality are constructed from retrospective birth histories reports in all Demographic and Health Surveys conducted in 83 low- and middle-income countries between 1985 and 2018. The surveys used in the analysis are listed in Table A1 in the appendix. The combined sample totals 5.2 million births, of which 27 and 55 percent are from low- and lower-middle income countries. The sample's infant mortality rate per 1000 births is 85, 61 and 37 for low-, lower-middle and upper-middle income countries respectively.

We estimate the relation between aggregate income change and infant mortality with the following framework:

$$D_{ict} = \alpha_c + \beta \log GDP_{ct} + \gamma_1 t_{ct} + \gamma_2 t_{ct}^2 + \gamma_3 t_{ct}^3 + \varepsilon_{ict}$$

$D_{ict}$  is a binary indicator taking the value 1 if child  $i$  in country  $c$  died in the first 12 months of life during year  $t$ .  $\log GDP$  is the natural logarithm of per capita GDP, and  $\varepsilon_{iact}$  is the error term. The  $\alpha$  and  $\gamma$  coefficients identify country-specific fixed effects and a cubic time trend, respectively. Standard errors are clustered at the country level. We estimate the semi-elasticity of infant mortality to aggregate income decline separately by country income level, as classified by the World Bank 2020 income groups. To explore the robustness of the findings, both we and Baird et al. (2011) find appreciably similar results with linear or quadratic time trends, as well as alternative recall periods for births (5 or 15 years as opposed to the default 10 years).

As a projection of the aggregate income shock in each country, we compare growth predictions for the same calendar period made before and then during the pandemic. Specifically, we use the IMF WEO 2020 growth rates projected in October 2019 and in October 2020. We define the difference between the two projections as the growth shortfall that is likely attributed to the pandemic and the ensuing economic crisis. Between October 2019 and October 2020, the IMF revised downwards growth projections for all countries. The average shortfall for lower- and middle-income countries is 9.3 percent. The average projected shortfall in low-income countries, 5.9 percent, is less than half of the projected average shortfall in upper-middle income countries, 12.5 percent.

To calculate the number of excess infant deaths that were likely caused by the pandemic in each country, we multiply the projected growth shortfalls with the  $\beta$  coefficient from the regression specification above. We then multiply by the projected number of births in each country, taken from the United Nation's World Population Prospects 2019. The total number of births are projected for the five-year period 2015-2020 and we assume equal amount of births in each year. (The projections are available at [population.un.org/wpp](http://population.un.org/wpp).)

## Patient and Public Involvement

The study presents analysis of secondary data. There was no patient and public involvement.

## Results

### Estimation of the GDP-Mortality relationship

The regression coefficient estimates are presented in Table 1. A 1% decrease in GDP per capita is associated with 0.23 increase in infant mortality per 1,000 children born in low- and middle-income countries. These estimates vary substantially by income group. A 1% decrease in per capita GDP is associated with increases of 0.48, 0.24 and 0.16 in infant mortality per 1,000 children born in low- lower-middle- and upper-middle-income countries, respectively.

Our estimate for the relationship between GDP and infant mortality is significantly lower than the estimate presented in Baird, Friedman and Schady (2011), using the same specification (5). This previous analysis estimated that a 1% decrease in GDP per capita is associated with a 0.40 increase in infant mortality per 1000 children born in low- and middle-income countries. Two things might drive this difference. First, we have a different composition of countries given that more DHS datasets are available. Our analysis includes 83 countries relative to 59 in the earlier paper. Second, resiliency to income shocks may have improved over time through higher average household incomes and more developed health systems.

## Projection of excess infant mortality in 2020

In Table 2, we report the estimated excess infant mortality in 128 low- and middle-income countries, along with 95% confidence interval around the estimate. In total, we estimate 267,208 (137,341-397,075) excess infant deaths in lower- and middle-income countries due to the growth shortfall in 2020. Most of the excess mortality is estimated to occur in the 46 lower-middle income countries, even though the income-mortality semi-elasticity in low-income countries (LIC) is almost twice the size of that in lower-middle income countries (LMIC). This is explained both by the fact that there are more countries and more populous countries in the LMIC group and because the IMF projects larger growth shortfalls in that group. It is worth noting that more than a third of the excess infant mortality is projected to be in India (99,642). India has the highest number of annual births (24,238,000) as well as a particularly large projected shortfall of -17.3%. Because of this, South Asia is the region with the highest expected excess infant mortality although there are only 8 countries included in the analysis. Nigeria and China are distant second and third with projected excess infant deaths of 11,904 and 10,835.

To benchmark our projections, we calculate the expected infant mortality in the absence of the pandemic for the 128 countries. According to the World Bank's World Development Indicators, estimated infant mortality rates in low-, lower-middle, and upper-middle countries were 48, 37 and 11 deaths per 1000 live births in 2019. We multiply these rates by the annual number of births in each country to forecast a total of 3,953,466 deaths. The excess deaths we project correspond to an increase of 6.8 percent in the total number of expected infant deaths.

## Discussion

In this study, we have assessed the potential impact of the 2020 economic downturn caused by the COVID-19 pandemic on infant mortality – we estimate almost 270,000 excess infant deaths in the 12 months following the pandemic start. A useful comparison point to this estimate is the 28,000 to 50,000 excess infant deaths estimated for Africa after the financial crisis in 2009 (7). Our Africa estimate in 2020 is 82,239 (37,858-126,620) infant deaths. This higher projection reflects the larger estimated GDP shortfalls. Several mechanisms are likely driving this increase in mortality among children aged 0-1: impoverishment at the household level will lead to worse nutrition and care practices for infants and reduced ability to access health services, while the economic crisis might also affect the supply and quality of services offered by the health systems. It is difficult to compare our estimates with other projections focusing on health system disruption as the main driver because the methodology, the age range and the time period are different. The most comparable study in its focus on child mortality which predicts 253,500 to 1,157,000 additional under-5 child deaths over the first six months of the pandemic, depending on the scenario severity (14).

Our estimates of excess infant mortality are not additional to previous projections but an alternative. Our reduced form approach yields estimates that already incorporate at least some consequences of reduced utilization of health services, i.e those reductions that have historically arose during severe economic downturns. Our estimates also directly account for other mechanisms, mainly increased poverty. As past economic crises were not driven by a pandemic, it is possible that the world will experience a higher mortality shock than implied by the historic income-mortality semi-elasticity. The current economic downturn is accompanied by more severe disruptions to the supply of effective health services. Therefore, our projections are likely to provide a lower bound of the actual excess mortality. However, the projections reported in this paper ascribe the difference between the WEO October 2019 and October 2020 economic growth projections for 2020 solely to the pandemic, even though some countries have also experienced other shocks, such as natural disasters or political crises.



1  
2  
3 One limitation of our analysis is that it relies on retrospective birth histories in Demographic and Health  
4 Surveys. In the absence of comprehensive and robust vital registration statistics in most of the countries  
5 included in this analysis, this is probably the best possible data source, but such household survey data  
6 might be affected by recall bias, especially for birth and deaths occurring long before the survey date. For  
7 this reason, we have explored the stability of estimates to alternative birth recall periods and find  
8 appreciably similar results. Another limitation is that we only consider the short-term impact of GDP  
9 fluctuations on mortality while longer-term implications might also exist. Lastly, the projections reported  
10 in this paper ascribe the difference between the WEO October 2019 and October 2020 economic growth  
11 projections for 2020 solely to the pandemic, even though some countries have also experienced other  
12 shocks, such as natural disasters or political crises.  
13  
14

15 The large number of excess infant deaths estimated in our analysis underscores the vulnerability of this  
16 age group to negative aggregate income shocks such as those induced by the COVID-19 pandemic.  
17 While we focused on the 0-1 age group, our estimates are suggestive of other vulnerabilities not directly  
18 attributable to COVID-19 among other segments of the population such as children aged 1-5, pregnant  
19 women, and the elderly. As countries, health systems, as well as the global community, continue efforts to  
20 prevent and treat COVID-19, we may also consider resources to stabilize health systems and strengthen  
21 social safety nets to mitigate the human, social and economic consequences of the pandemic and related  
22 lockdown policies.  
23  
24  
25  
26

## 27 **Declaration of interests**

28 We declare no competing interests.  
29

## 30 **Funding**

31 This study did not require funding.  
32  
33

## 34 **Contributor Statement**

35 All authors contributed to the conceptualization, design of the methodology and the writing. GS  
36 conducted the formal analysis and JF and GS validated the results.  
37  
38

## 39 **Acknowledgments**

40 We gratefully acknowledge the excellent support provided by Salome Drouard as a research assistant.  
41 The findings, interpretations, and conclusions expressed in this paper are entirely those of the authors and  
42 do not necessarily represent the views of the World Bank, its executive directors, of the governments of  
43 the countries they represent, or of the authors themselves.

44  
45  
46  
47  
48  
49  
50  
51  
52  
53  
54  
55  
56  
57  
58  
59  
60

## References

1. *Assessing the age specificity of infection fatality rates for COVID-19: systematic review, meta-analysis, and public policy implications.* **Levin, Andrew T., William P. Hanage, Nana Owusu-Boaitey, Kensington B. Cochran, Seamus P. Walsh, and Gideon Meyerowitz-Katz.** 2020, *European journal of epidemiology*, pp. 1-16.
2. *Health effects of economic crises.* **Ruhm, Christopher J.** 2016, *Health Economics*, pp. 6-24.
3. *Wealthier is Healthier.* **Pritchett, Lant, and Lawrence H. Summers.** 1996, *Journal of Human Resources*, pp. 841-868.
4. *Fatal fluctuations? Cyclicity in infant mortality in India.* **Bhalotra, Sonia.** 2010, *Journal of Development Economics*, pp. 7-19.
5. *Aggregate income shocks and infant mortality in the developing world.* **Baird, Sarah, Jed Friedman, and Norbert Schady.** 2011, *Review of Economics and statistics*, pp. 847-856.
6. *Economic crises, maternal and infant mortality, low birth weight and enrollment rates: evidence from Argentina's downturns.* **Cruces, Guillermo, Pablo Glüzmann, and Luis Felipe López Calva.** 2012, *World Development*, pp. 303-314.
7. *How many infants likely died in Africa as a result of the 2008–2009 global financial crisis?* **Friedman, Jed, and Norbert Schady.** 2013, *Health Economics*, pp. 611-622.
8. *Effects of economic downturns on child mortality: a global economic analysis, 1981–2010.* **Maruthappu, Mahiben, Robert A. Watson, Johnathan Watkins, Thomas Zeltner, Rosalind Raine, and Rifat Atun.** 2017, *BMJ global health*.
9. *Routine childhood immunisation during the COVID-19 pandemic in Africa: a benefit–risk analysis of health benefits versus excess risk of SARS-CoV-2 infection.* **Abbas, Kaja, Simon R. Procter, Kevin van Zandvoort, Andrew Clark, Sebastian Funk, Tewodaj Mengistu, Dan Hogan et al.** 10, 2020, *The Lancet Global Health*, Vol. 8, pp. e1264-e1272.
10. *Potential impact of the COVID-19 pandemic on HIV, tuberculosis, and malaria in low-income and middle-income countries: a modelling study.* **Hogan, Alexandra B., Britta L. Jewell, Ellie Sherrard-Smith, Juan F. Vesga, Oliver J. Watson, Charles Whittaker, Arran Hamlet et al.** 10, 2020, *The Lancet Global Health*, Vol. 8, pp. e1132-e1141.
11. *Potential effects of disruption to HIV programmes in sub-Saharan Africa caused by COVID-19: results from multiple mathematical models.* **Jewell, Britta L., Edinah Mudimu, John Stover, Debra Ten Brink, Andrew N. Phillips, Jennifer A. Smith, Rowan Martin-Hughes et al.** 9, 2020, *The Lancet HIV*, Vol. 7, pp. e629-e640.
12. *The potential public health consequences of COVID-19 on malaria in Africa.* **Sherrard-Smith, Ellie, Alexandra B. Hogan, Arran Hamlet, Oliver J. Watson, Charlie Whittaker, Peter Winskill, Fatima Ali et al.** 1, 2020, *Nature medicine*, Vol. 26, pp. 1411-1416.
13. **Organization, World Health.** *Pulse survey on continuity of essential health services during the COVID-19 pandemic.* 2020.

1  
2  
3 14. *Early estimates of the indirect effects of the COVID-19 pandemic on maternal and child mortality in*  
4 *low-income and middle-income countries: a modelling study.* **Roberton, Timothy, Emily D. Carter,**  
5 **Victoria B. Chou, Angela R. Stegmuller, Bianca D. Jackson, Yvonne Tam, Talata Sawadogo-Lewis,**  
6 **and Neff Walker.** 7, 2020, *The Lancet Global Health*, Vol. 8, pp. e901-e908.

8  
9 15. *Impact of COVID-19 pandemic response on uptake of routine immunizations in Sindh, Pakistan: an*  
10 *analysis of provincial electronic immunization registry data.* **Chandir, Subhash, Danya Arif Siddiqi,**  
11 **Mariam Mehmood, Hamidreza Setayesh, Muhammad Siddique, Amna Mirza, Riswana**  
12 **Soundardjee et al.** 45, 2020, *Vaccine*, Vol. 38, pp. 7146-7155.

13  
14 16. *Child healthcare and immunizations in sub-Saharan Africa during the COVID-19 pandemic.*  
15 **Buonsenso, Danilo, Bianca Cinicola, Memenatu Ngaima Kallon, and Francesco Iodice.** *Frontiers in*  
16 *pediatrics*, p. 517.

17  
18 17. *Access to primary healthcare during lockdown measures for COVID-19 in rural South Africa: an*  
19 *interrupted time series analysis.* **Siedner, Mark J., John D. Kraemer, Mark J. Meyer, Guy Harling,**  
20 **Thobeka Mngomezulu, Patrick Gabela, Siphephelo Dlamini et al.** 2020, *BMJ open*.

21  
22 18. **Fund, International Monetary.** *World Economic Outlook, October 2020: A Long and Difficult*  
23 *Ascent.* . 2020.

24  
25 19. **CHRISTOPH LAKNER, NISHANT YONZANDANIEL GERSZON MAHLERR. ANDRES**  
26 **CASTANEDA AND AGUILARHAOYU WU.** Updated estimates of the impact of COVID-19 on global  
27 poverty: Looking back at 2020 and the outlook for 2021.

28  
29 20. *Falling living standards during the COVID-19 crisis: Quantitative evidence from nine developing*  
30 *countries.* **DENNIS EGGER, EDWARD MIGUEL, SHANA S. WARREN, ASHISH SHENOY,**  
31 **ELLIOTT COLLINS, DEAN KARLAN, DOUG PARKERSON, A. MUSHFIQ MOBARAK,**  
32 **GÜNTHER FINK, CHRISTOPHER UDRY, MICHAEL WALKER, JOHANNES HAUSHOFER,**  
33 **MAGDALENA LARREBOURE, SUSAN ATHEY, PAULA LOPEZ-PENA, SALIM B.** 2021,  
34 *Science Advances*.

35  
36 22. *The impact of the COVID-19 epidemic on tuberculosis control in China.* **Fei, Huang, Xia Yinyin,**  
37 **Chen Hui, Wang Ni, Du Xin, Chen Wei, Li Tao et al.** 2020, *The Lancet Regional Health-Western*  
38 *Pacific*.

39  
40 23. *Effect of the COVID-19 pandemic on viral hepatitis services in sub-Saharan Africa.* **Lemoine, Maud,**  
41 **Jin Un Kim, Gibril Ndow, Sulayman Bah, Karen Forrest, John Rwegasha, Marielle Bouyou et al.**  
42 2020, *The Lancet Gastroenterology & Hepatology*, pp. 966-967.

## Tables

**Table 1: Relationship between aggregate income shocks and infant mortality rate per 1,000 children, by World Bank country income groups**

| Low-income countries | Lower-middle-income countries | Upper-middle-income countries | Low- and middle-income countries |
|----------------------|-------------------------------|-------------------------------|----------------------------------|
| -46.85***<br>(17.71) | -23.73***<br>(5.50)           | -16.08***<br>(6.80)           | -23.12***<br>(9.38)              |

Notes: Overall number of observed births is 5,273,350. The table presents coefficient estimates from regressions of infant mortality log per capita GDP with time trends and country fixed effects. There are four income groupings for countries; the country income groups follow the World Bank classification for fiscal year 2021.

\* p<0.10, \*\* p<0.05, \*\*\* p<0.01.

**Table 2: Projection of excess infant deaths with 95% confidence intervals, by World Bank country income groups and regions**

|                                 | Estimate | 95% CI            | Countries |
|---------------------------------|----------|-------------------|-----------|
| <b>Total</b>                    | 267,318  | 137,341 – 397,075 | 128       |
| <b>By income group:</b>         |          |                   |           |
| Low-income economies            | 65,628   | 25,787-105,468    | 29        |
| Lower-middle income economies   | 158,638  | 98,400-218,875    | 46        |
| Upper-middle income economies   | 42,942   | 13,153-72,732     | 53        |
| <b>By region:</b>               |          |                   |           |
| Sub-Saharan Africa              | 82,239   | 37,858-126,620    | 48        |
| East Asia and Pacific           | 32,537   | 16,106-48,968     | 19        |
| Europe and Central Asia         | 7,962    | 3,284-12,640      | 20        |
| Latin America and the Caribbean | 17,202   | 5,844-28,559      | 23        |
| Middle East and North Africa    | 14,127   | 5,710-22,544      | 10        |
| South Asia                      | 113,141  | 68,539-157,743    | 8         |

Notes: The definitions of income groups and regions are based on the World Bank country group categorization for the 2021 fiscal year.

1  
2  
3  
4  
5  
6  
7  
8  
9  
10  
11  
12  
13  
14  
15  
16  
17  
18  
19  
20  
21  
22  
23  
24  
25  
26  
27  
28  
29  
30  
31  
32  
33  
34  
35  
36  
37  
38  
39  
40  
41  
42  
43  
44  
45  
46  
47  
48  
49  
50  
51  
52  
53  
54  
55  
56  
57  
58  
59  
60

For peer review only

**Appendix Table A1: Demographic and Health Surveys datasets used in the analysis**

| Low-income                              | Lower-middle income                                      | Upper-middle income                                         |
|-----------------------------------------|----------------------------------------------------------|-------------------------------------------------------------|
| Afghanistan 2015                        | Angola 2016                                              | Albania 2009, 2018                                          |
| Benin 1996, 2001, 2006, 2012, 2018      | Bangladesh 1994, 1997, 2000, 2004, 2007, 2011, 2014      | Armenia 2000, 2005, 2010, 2016                              |
| Burkina Faso 1993, 1999, 2003, 2010     | Bolivia 1989, 1994, 1998, 2004, 2008                     | Azerbaijan 2006                                             |
| Burundi 1987, 2011, 2017                | Cambodia 2000, 2006, 2011, 2014                          | Brazil 1986, 1992, 1996                                     |
| Central African Republic 1995           | Cameroon 1991, 1998, 2004, 2011, 2018                    | Colombia 1986, 1990, 1995, 2000, 2005, 2010, 2016           |
| DRC 2007, 2014                          | Comoros 1996, 2012                                       | Dominican Republic 1986, 1991, 1996, 1999, 2002, 2007, 2013 |
| Ethiopia 2000, 2005, 2011, 2016         | Republic of Congo 2005, 2012                             | Ecuador 1987                                                |
| Gambia 2013                             | Cote d'Ivoire 1994, 1999, 2012                           | Gabon 2001, 2012                                            |
| Guinea 1999, 2005, 2012, 2018           | Egypt 1989, 1993, 1996, 2003, 2005, 2008, 2014           | Guatemala 1987, 1995, 1999, 2015                            |
| Haiti 1995, 2000, 2006, 2012, 2017      | El Salvador 1985                                         | Guyana 2009                                                 |
| Liberia 2007, 2013                      | Eswatini 2007                                            | Jordan 1990, 1997, 2002, 2007, 2012, 2018                   |
| Madagascar 1992, 1997, 2004, 2009       | Ghana 1988, 1994, 2003, 2008, 2014                       | Kazakhstan 1995, 1999                                       |
| Malawi 1992, 2000, 2005, 2010, 2016     | Honduras 2006, 2012                                      | Maldives 2009, 2017                                         |
| Mali 1987, 1996, 2001, 2006, 2013, 2018 | India 1993, 1999, 2006, 2016                             | Mexico 1987                                                 |
| Mozambique 1997, 2004, 2011, 2015       | Indonesia 1987, 1991, 1994, 1997, 2003, 2007, 2012, 2017 | Namibia 1992, 2000, 2007, 2013                              |
| Nepal 1997, 2001, 2006, 2011, 2017      | Kenya 1989, 1993, 1998, 2003, 2009, 2014                 | Paraguay 1990                                               |
| Niger 1992, 1998, 2006, 2012            | Kyrgyz Republic 1997, 2012                               | Peru 1986, 1992, 1996, 2000, 2004-2012*                     |
| Rwanda 1992, 2000, 2008, 2011, 2015     | Lesotho 2005, 2010, 2014                                 |                                                             |
| Sierra Leone 2008, 2013                 | Moldova 2005                                             |                                                             |
| Tajikistan 2012, 2017                   | Morocco 1987, 1992, 2004                                 |                                                             |
| Tanzania 1999, 2005, 2012, 2016         | Myanmar 2016                                             |                                                             |
| Togo 1988, 1998, 2014                   | Nicaragua 1998, 2001                                     |                                                             |
| Uganda 1989, 1995, 2001, 2006           | Nigeria 1990, 2003, 2008, 2013, 2018                     |                                                             |
| Yemen 1992, 2013                        | Pakistan 1991, 2007, 2013, 2018                          |                                                             |
|                                         | Papua New Guinea 2018                                    |                                                             |
|                                         | Philippines 1993, 1998, 2003, 2008, 2013, 2017           |                                                             |
|                                         | Sao Tome and Principe 2009                               |                                                             |
|                                         | Senegal 1986, 1993, 1997, 2011, 2012-2018*               |                                                             |
|                                         | Sudan 1990                                               |                                                             |
|                                         | Timor Leste 2010, 2016                                   |                                                             |
|                                         | Tunisia 1988                                             |                                                             |
|                                         | Ukraine 2007                                             |                                                             |
|                                         | Uzbekistan 1996                                          |                                                             |
|                                         | Vietnam 1997, 2002                                       |                                                             |
|                                         | Zambia 1992, 1997, 2002, 2007, 2014, 2018                |                                                             |
|                                         | Zimbabwe 1989, 1994, 1999, 2006, 2011, 2015              |                                                             |

Notes: some surveyed spanned over more than one calendar year. In these cases, the last year of the survey is indicated.

\* Senegal and Peru had special continuous survey. Peru had annual survey between 2004 and 2012 and Senegal completed annual surveys between 2012 to 2018.

Appendix Table A2: Projections of growth shortfall and excess infant mortality in lower- and middle-income countries

| Country                                             | Region <sup>a</sup> | Number of annual birth 2015-2020 (in thousands) <sup>b</sup> | WEO projections of 2020 growth <sup>c</sup> |                         |                  | Excess mortality projection |                 |                  |
|-----------------------------------------------------|---------------------|--------------------------------------------------------------|---------------------------------------------|-------------------------|------------------|-----------------------------|-----------------|------------------|
|                                                     |                     |                                                              | October 2019 projection                     | October 2020 projection | Growth Shortfall | estimate                    | 95% lower bound | 95% higher bound |
| <b>Panel A: Lower Income Economies <sup>a</sup></b> |                     |                                                              |                                             |                         |                  |                             |                 |                  |
| Afghanistan                                         | SAR                 | 1205                                                         | 3.5                                         | -5.0                    | -8.5             | 4888                        | 1921            | 7855             |
| Benin                                               | AFR                 | 413                                                          | 6.7                                         | 2.0                     | -4.7             | 930                         | 365             | 1494             |
| Burkina Faso                                        | AFR                 | 745                                                          | 6.0                                         | -2.0                    | -8.0             | 2852                        | 1120            | 4583             |
| Burundi                                             | AFR                 | 433                                                          | 0.5                                         | -3.2                    | -3.7             | 775                         | 305             | 1246             |
| Central African Republic                            | AFR                 | 165                                                          | 5.0                                         | -1.0                    | -5.9             | 468                         | 184             | 752              |
| Chad                                                | AFR                 | 648                                                          | 5.4                                         | -0.7                    | -6.1             | 1894                        | 744             | 3043             |
| Congo, Dem. Rep.                                    | AFR                 | 3434                                                         | 3.9                                         | -2.2                    | -6.0             | 9925                        | 3900            | 15951            |
| Eritrea                                             | AFR                 | 106                                                          | 3.9                                         | -0.6                    | -4.5             | 226                         | 89              | 364              |
| Ethiopia                                            | AFR                 | 3514                                                         | 7.2                                         | 1.9                     | -5.3             | 8832                        | 3470            | 14193            |
| Gambia, The                                         | AFR                 | 87                                                           | 6.4                                         | -1.8                    | -8.2             | 343                         | 135             | 550              |
| Guinea                                              | AFR                 | 449                                                          | 6.0                                         | 1.4                     | -4.5             | 970                         | 381             | 1559             |
| Guinea-Bissau                                       | AFR                 | 66                                                           | 4.9                                         | -2.9                    | -7.8             | 245                         | 96              | 393              |
| Haiti                                               | LAC                 | 271                                                          | 1.2                                         | -4.0                    | -5.2             | 674                         | 265             | 1084             |
| Liberia                                             | AFR                 | 158                                                          | 1.6                                         | -3.0                    | -4.6             | 345                         | 136             | 555              |
| Madagascar                                          | AFR                 | 852                                                          | 5.3                                         | -3.2                    | -8.5             | 3454                        | 1357            | 5551             |
| Malawi                                              | AFR                 | 614                                                          | 5.1                                         | 0.6                     | -4.5             | 1323                        | 520             | 2126             |
| Mali                                                | AFR                 | 787                                                          | 5.0                                         | -2.0                    | -7.0             | 2631                        | 1034            | 4229             |
| Mozambique                                          | AFR                 | 1099                                                         | 6.0                                         | -0.5                    | -6.5             | 3441                        | 1352            | 5530             |
| Nepal                                               | SAR                 | 562                                                          | 6.3                                         | 0.0                     | -6.3             | 1681                        | 660             | 2701             |
| Niger                                               | AFR                 | 1023                                                         | 6.1                                         | 0.5                     | -5.6             | 2717                        | 1067            | 4366             |
| Rwanda                                              | AFR                 | 390                                                          | 8.1                                         | 2.0                     | -6.1             | 1142                        | 449             | 1835             |
| Sierra Leone                                        | AFR                 | 255                                                          | 4.7                                         | -3.1                    | -7.7             | 945                         | 371             | 1519             |
| Somalia                                             | AFR                 | 622                                                          | 3.2                                         | -1.5                    | -4.7             | 1398                        | 549             | 2246             |
| South Sudan                                         | AFR                 | 386                                                          | 8.2                                         | 4.1                     | -4.1             | 757                         | 297             | 1216             |
| Tajikistan                                          | ECA                 | 281                                                          | 4.5                                         | 1.0                     | -3.5             | 470                         | 185             | 756              |
| Tanzania                                            | AFR                 | 2052                                                         | 5.7                                         | 1.9                     | -3.8             | 3732                        | 1466            | 5998             |
| Togo                                                | AFR                 | 260                                                          | 5.3                                         | 0.0                     | -5.3             | 659                         | 259             | 1059             |
| Uganda                                              | AFR                 | 1614                                                         | 6.2                                         | -0.3                    | -6.5             | 5022                        | 1973            | 8071             |
| Yemen, Rep.                                         | MNA                 | 865                                                          | 2.0                                         | -5.0                    | -7.0             | 2890                        | 1136            | 4644             |

| <b>Panel B: Lower-Middle Income Economies <sup>a</sup></b> |     |       |      |       |       |       |       |        |
|------------------------------------------------------------|-----|-------|------|-------|-------|-------|-------|--------|
| Angola                                                     | AFR | 1243  | 1.2  | -4.0  | -5.2  | 1523  | 945   | 2102   |
| Bangladesh                                                 | SAR | 2946  | 7.4  | 3.8   | -3.6  | 2550  | 1581  | 3518   |
| Bhutan                                                     | SAR | 13    | 7.2  | 0.6   | -6.6  | 21    | 13    | 29     |
| Bolivia                                                    | LAC | 247   | 3.8  | -7.9  | -11.7 | 685   | 425   | 945    |
| Cabo Verde                                                 | AFR | 11    | 5.0  | -6.8  | -11.7 | 30    | 18    | 41     |
| Cambodia                                                   | EAP | 366   | 6.8  | -2.8  | -9.5  | 828   | 514   | 1143   |
| Cameroon                                                   | AFR | 887   | 4.2  | -2.8  | -6.9  | 1461  | 906   | 2016   |
| Comoros                                                    | AFR | 26    | 4.2  | -1.8  | -6.1  | 38    | 24    | 52     |
| Congo, Rep.                                                | AFR | 171   | 2.8  | -7.0  | -9.8  | 398   | 247   | 549    |
| Côte d'Ivoire                                              | AFR | 890   | 7.3  | 1.8   | -5.5  | 1161  | 720   | 1602   |
| Djibouti                                                   | AFR | 21    | 6.0  | -1.0  | -7.0  | 34    | 21    | 47     |
| Egypt                                                      | MNA | 2584  | 5.9  | 3.5   | -2.3  | 1424  | 883   | 1964   |
| El Salvador                                                | LAC | 118   | 2.3  | -9.0  | -11.3 | 315   | 196   | 435    |
| Eswatini                                                   | AFR | 30    | 0.5  | -3.5  | -4.0  | 29    | 18    | 39     |
| Ghana                                                      | AFR | 871   | 5.6  | 0.9   | -4.7  | 968   | 600   | 1335   |
| Honduras                                                   | LAC | 207   | 3.5  | -6.6  | -10.1 | 496   | 308   | 684    |
| India                                                      | SAR | 24238 | 7.0  | -10.3 | -17.3 | 99642 | 61806 | 137478 |
| Indonesia                                                  | EAP | 4842  | 5.1  | -1.5  | -6.6  | 7549  | 4683  | 10416  |
| Kenya                                                      | AFR | 1469  | 6.0  | 1.0   | -5.0  | 1743  | 1081  | 2404   |
| Kiribati                                                   | EAP | 3     | 2.3  | -1.1  | -3.4  | 3     | 2     | 4      |
| Kyrgyz Republic                                            | ECA | 155   | 3.4  | -12.0 | -15.4 | 566   | 351   | 782    |
| Lao PDR                                                    | EAP | 167   | 6.5  | 0.2   | -6.3  | 250   | 155   | 345    |
| Lesotho                                                    | AFR | 57    | -0.2 | -4.8  | -4.6  | 62    | 39    | 86     |
| Mauritania                                                 | AFR | 147   | 5.9  | -3.2  | -9.1  | 318   | 197   | 439    |
| Micronesia, Fed. Sts.                                      | EAP | 3     | 0.8  | -3.8  | -4.6  | 3     | 2     | 4      |
| Moldova                                                    | ECA | 41    | 3.8  | -4.5  | -8.3  | 81    | 50    | 112    |
| Mongolia                                                   | EAP | 77    | 5.4  | -2.0  | -7.4  | 134   | 83    | 185    |
| Morocco                                                    | MNA | 682   | 3.7  | -7.0  | -10.7 | 1725  | 1070  | 2380   |
| Myanmar                                                    | EAP | 948   | 6.3  | 2.0   | -4.3  | 959   | 595   | 1323   |
| Nicaragua                                                  | LAC | 134   | -0.8 | -5.5  | -4.7  | 151   | 94    | 208    |
| Nigeria                                                    | AFR | 7377  | 2.5  | -4.3  | -6.8  | 11904 | 7384  | 16424  |
| Pakistan                                                   | SAR | 5994  | 2.4  | -0.4  | -2.7  | 3891  | 2413  | 5368   |
| Papua New Guinea                                           | EAP | 232   | 2.6  | -3.3  | -5.8  | 322   | 200   | 444    |
| Philippines                                                | EAP | 2178  | 6.2  | -8.3  | -14.4 | 7466  | 4631  | 10301  |



|    |                                                            |     |      |      |       |       |       |      |       |
|----|------------------------------------------------------------|-----|------|------|-------|-------|-------|------|-------|
| 1  |                                                            |     |      |      |       |       |       |      |       |
| 2  |                                                            |     |      |      |       |       |       |      |       |
| 3  |                                                            |     |      |      |       |       |       |      |       |
| 4  | Senegal                                                    | AFR | 544  | 6.8  | -0.7  | -7.4  | 961   | 596  | 1325  |
| 5  | Solomon Islands                                            | EAP | 21   | 2.9  | -5.0  | -7.9  | 39    | 24   | 54    |
| 6  | Sudan                                                      | AFR | 1339 | -1.5 | -8.4  | -6.9  | 2182  | 1353 | 3010  |
| 7  | São Tomé and Príncipe                                      | AFR | 7    | 3.5  | -6.5  | -10.0 | 16    | 10   | 22    |
| 8  | Timor-Leste                                                | EAP | 37   | 5.0  | -6.8  | -11.8 | 105   | 65   | 144   |
| 9  | Tunisia                                                    | MNA | 204  | 2.4  | -7.0  | -9.5  | 458   | 284  | 632   |
| 10 | Ukraine                                                    | ECA | 426  | 3.0  | -7.2  | -10.2 | 1032  | 640  | 1424  |
| 11 | Uzbekistan                                                 | ECA | 703  | 6.0  | 0.7   | -5.3  | 884   | 548  | 1219  |
| 12 | Vanuatu                                                    | EAP | 9    | 3.1  | -8.3  | -11.4 | 23    | 14   | 32    |
| 13 | Vietnam                                                    | EAP | 1610 | 6.5  | 1.6   | -4.9  | 1872  | 1161 | 2583  |
| 14 | Zambia                                                     | AFR | 622  | 1.7  | -4.8  | -6.5  | 963   | 597  | 1328  |
| 15 | Zimbabwe                                                   | AFR | 442  | 2.7  | -10.4 | -13.1 | 1375  | 853  | 1897  |
| 16 | Nigeria                                                    | AFR | 7377 | 2.5  | -4.3  | -6.8  | 11904 | 7384 | 16424 |
| 17 | Pakistan                                                   | SAR | 5994 | 2.4  | -0.4  | -2.7  | 3891  | 2413 | 5368  |
| 18 | Papua New Guinea                                           | EAP | 232  | 2.6  | -3.3  | -5.8  | 322   | 200  | 444   |
| 19 | Philippines                                                | EAP | 2178 | 6.2  | -8.3  | -14.4 | 7466  | 4631 | 10301 |
| 20 | Senegal                                                    | AFR | 544  | 6.8  | -0.7  | -7.4  | 961   | 596  | 1325  |
| 21 | Solomon Islands                                            | EAP | 21   | 2.9  | -5.0  | -7.9  | 39    | 24   | 54    |
| 22 | Sudan                                                      | AFR | 1339 | -1.5 | -8.4  | -6.9  | 2182  | 1353 | 3010  |
| 23 | São Tomé and Príncipe                                      | AFR | 7    | 3.5  | -6.5  | -10.0 | 16    | 10   | 22    |
| 24 | Timor-Leste                                                | EAP | 37   | 5.0  | -6.8  | -11.8 | 105   | 65   | 144   |
| 25 | Tunisia                                                    | MNA | 204  | 2.4  | -7.0  | -9.5  | 458   | 284  | 632   |
| 26 | Ukraine                                                    | ECA | 426  | 3.0  | -7.2  | -10.2 | 1032  | 640  | 1424  |
| 27 | Uzbekistan                                                 | ECA | 703  | 6.0  | 0.7   | -5.3  | 884   | 548  | 1219  |
| 28 | Vanuatu                                                    | EAP | 9    | 3.1  | -8.3  | -11.4 | 23    | 14   | 32    |
| 29 | Vietnam                                                    | EAP | 1610 | 6.5  | 1.6   | -4.9  | 1872  | 1161 | 2583  |
| 30 | Zambia                                                     | AFR | 622  | 1.7  | -4.8  | -6.5  | 963   | 597  | 1328  |
| 31 | Zimbabwe                                                   | AFR | 442  | 2.7  | -10.4 | -13.1 | 1375  | 853  | 1897  |
| 32 |                                                            |     |      |      |       |       |       |      |       |
| 33 |                                                            |     |      |      |       |       |       |      |       |
| 34 | <b>Panel C: Upper-Middle Income Economies <sup>a</sup></b> |     |      |      |       |       |       |      |       |
| 35 | Albania                                                    | ECA | 34   | 4.0  | -7.5  | -11.6 | 63    | 19   | 107   |
| 36 | Algeria                                                    | MNA | 1032 | 2.4  | -5.5  | -7.9  | 1305  | 400  | 2211  |
| 37 | Argentina                                                  | LAC | 755  | -1.3 | -11.8 | -10.5 | 1276  | 391  | 2161  |
| 38 | Armenia                                                    | ECA | 42   | 4.8  | -4.5  | -9.3  | 62    | 19   | 105   |
| 39 | Azerbaijan                                                 | ECA | 169  | 2.1  | -4.0  | -6.1  | 167   | 51   | 282   |
| 40 | Belarus                                                    | ECA | 112  | 0.3  | -3.0  | -3.3  | 59    | 18   | 100   |
| 41 |                                                            |     |      |      |       |       |       |      |       |
| 42 |                                                            |     |      |      |       |       |       |      |       |
| 43 |                                                            |     |      |      |       |       |       |      |       |
| 44 |                                                            |     |      |      |       |       |       |      |       |
| 45 |                                                            |     |      |      |       |       |       |      |       |
| 46 |                                                            |     |      |      |       |       |       |      |       |
| 47 |                                                            |     |      |      |       |       |       |      |       |

|    |                        |     |       |      |       |       |       |      |       |
|----|------------------------|-----|-------|------|-------|-------|-------|------|-------|
| 1  |                        |     |       |      |       |       |       |      |       |
| 2  |                        |     |       |      |       |       |       |      |       |
| 3  |                        |     |       |      |       |       |       |      |       |
| 4  |                        |     |       |      |       |       |       |      |       |
| 5  |                        |     |       |      |       |       |       |      |       |
| 6  |                        |     |       |      |       |       |       |      |       |
| 7  |                        |     |       |      |       |       |       |      |       |
| 8  |                        |     |       |      |       |       |       |      |       |
| 9  |                        |     |       |      |       |       |       |      |       |
| 10 |                        |     |       |      |       |       |       |      |       |
| 11 |                        |     |       |      |       |       |       |      |       |
| 12 |                        |     |       |      |       |       |       |      |       |
| 13 |                        |     |       |      |       |       |       |      |       |
| 14 |                        |     |       |      |       |       |       |      |       |
| 15 |                        |     |       |      |       |       |       |      |       |
| 16 |                        |     |       |      |       |       |       |      |       |
| 17 |                        |     |       |      |       |       |       |      |       |
| 18 |                        |     |       |      |       |       |       |      |       |
| 19 |                        |     |       |      |       |       |       |      |       |
| 20 |                        |     |       |      |       |       |       |      |       |
| 21 |                        |     |       |      |       |       |       |      |       |
| 22 |                        |     |       |      |       |       |       |      |       |
| 23 |                        |     |       |      |       |       |       |      |       |
| 24 |                        |     |       |      |       |       |       |      |       |
| 25 |                        |     |       |      |       |       |       |      |       |
| 26 |                        |     |       |      |       |       |       |      |       |
| 27 |                        |     |       |      |       |       |       |      |       |
| 28 |                        |     |       |      |       |       |       |      |       |
| 29 |                        |     |       |      |       |       |       |      |       |
| 30 |                        |     |       |      |       |       |       |      |       |
| 31 |                        |     |       |      |       |       |       |      |       |
| 32 |                        |     |       |      |       |       |       |      |       |
| 33 |                        |     |       |      |       |       |       |      |       |
| 34 |                        |     |       |      |       |       |       |      |       |
| 35 |                        |     |       |      |       |       |       |      |       |
| 36 |                        |     |       |      |       |       |       |      |       |
| 37 |                        |     |       |      |       |       |       |      |       |
| 38 |                        |     |       |      |       |       |       |      |       |
| 39 |                        |     |       |      |       |       |       |      |       |
| 40 |                        |     |       |      |       |       |       |      |       |
| 41 |                        |     |       |      |       |       |       |      |       |
| 42 |                        |     |       |      |       |       |       |      |       |
| 43 |                        |     |       |      |       |       |       |      |       |
| 44 |                        |     |       |      |       |       |       |      |       |
| 45 |                        |     |       |      |       |       |       |      |       |
| 46 |                        |     |       |      |       |       |       |      |       |
| 47 |                        |     |       |      |       |       |       |      |       |
|    | Belize                 | LAC | 8     | 2.1  | -16.0 | -18.1 | 23    | 7    | 39    |
|    | Bosnia and Herzegovina | ECA | 27    | 2.6  | -6.5  | -9.1  | 40    | 12   | 68    |
|    | Botswana               | AFR | 56    | 4.3  | -9.6  | -14.0 | 126   | 39   | 214   |
|    | Brazil                 | LAC | 2934  | 2.0  | -5.8  | -7.8  | 3700  | 1133 | 6267  |
|    | Bulgaria               | ECA | 63    | 3.2  | -4.0  | -7.2  | 73    | 22   | 124   |
|    | China                  | EAP | 16978 | 5.8  | 1.9   | -4.0  | 10835 | 3319 | 18351 |
|    | Colombia               | LAC | 739   | 3.6  | -8.2  | -11.8 | 1407  | 431  | 2383  |
|    | Costa Rica             | LAC | 70    | 2.5  | -5.5  | -8.0  | 91    | 28   | 153   |
|    | Dominican Republic     | LAC | 208   | 5.2  | -6.0  | -11.2 | 375   | 115  | 636   |
|    | Ecuador                | LAC | 336   | 0.5  | -11.0 | -11.5 | 621   | 190  | 1051  |
|    | Equatorial Guinea      | AFR | 43    | -5.0 | -6.0  | -1.0  | 7     | 2    | 12    |
|    | Fiji                   | EAP | 19    | 3.0  | -21.0 | -24.0 | 73    | 22   | 124   |
|    | Gabon                  | AFR | 67    | 3.4  | -2.7  | -6.1  | 65    | 20   | 111   |
|    | Georgia                | ECA | 54    | 4.8  | -5.0  | -9.8  | 86    | 26   | 145   |
|    | Grenada                | LAC | 2     | 2.7  | -11.8 | -14.5 | 4     | 1    | 7     |
|    | Guatemala              | LAC | 423   | 3.5  | -2.0  | -5.5  | 377   | 115  | 639   |
|    | Guyana                 | LAC | 16    | 85.6 | 26.2  | -59.4 | 149   | 46   | 252   |
|    | Iran                   | MNA | 1552  | 0.0  | -5.0  | -5.0  | 1257  | 385  | 2128  |
|    | Iraq                   | MNA | 1104  | 4.7  | -12.1 | -16.7 | 2972  | 910  | 5034  |
|    | Jamaica                | LAC | 47    | 1.0  | -8.6  | -9.6  | 73    | 22   | 124   |
|    | Jordan                 | MNA | 215   | 2.4  | -5.0  | -7.4  | 255   | 78   | 433   |
|    | Kazakhstan             | ECA | 389   | 3.9  | -2.7  | -6.6  | 413   | 127  | 700   |
|    | Lebanon                | MNA | 117   | 0.9  | -25.0 | -25.9 | 488   | 149  | 827   |
|    | Libya                  | MNA | 126   | 0.0  | -66.7 | -66.6 | 1353  | 414  | 2292  |
|    | Malaysia               | EAP | 527   | 4.4  | -6.0  | -10.4 | 882   | 270  | 1494  |
|    | Maldives               | SAR | 7     | 6.0  | -18.6 | -24.6 | 28    | 9    | 48    |
|    | Mauritius              | AFR | 13    | 3.8  | -14.2 | -18.0 | 38    | 12   | 64    |
|    | Mexico                 | LAC | 2224  | 1.3  | -9.0  | -10.3 | 3670  | 1124 | 6216  |
|    | Montenegro             | ECA | 7     | 2.5  | -12.0 | -14.5 | 17    | 5    | 29    |
|    | Namibia                | AFR | 70    | 1.6  | -5.9  | -7.4  | 83    | 26   | 141   |
|    | North Macedonia        | ECA | 23    | 3.4  | -5.4  | -8.8  | 32    | 10   | 54    |
|    | Paraguay               | LAC | 143   | 4.0  | -4.0  | -8.0  | 185   | 57   | 313   |
|    | Peru                   | LAC | 574   | 3.6  | -13.9 | -17.6 | 1621  | 497  | 2746  |
|    | Romania                | ECA | 192   | 3.5  | -4.8  | -8.3  | 256   | 78   | 433   |
|    | Russia                 | ECA | 1858  | 1.9  | -4.1  | -6.0  | 1788  | 548  | 3029  |

1  
2  
3  
4  
5  
6  
7  
8  
9  
10  
11  
12  
13  
14  
15  
16  
17  
18  
19  
20  
21  
22  
23  
24  
25  
26  
27  
28  
29  
30  
31  
32  
33  
34  
35  
36  
37  
38  
39  
40  
41  
42  
43  
44  
45  
46  
47

|                                |     |      |       |       |       |      |     |      |
|--------------------------------|-----|------|-------|-------|-------|------|-----|------|
| Samoa                          | EAP | 5    | 4.4   | -5.0  | -9.4  | 7    | 2   | 12   |
| Serbia                         | ECA | 84   | 4.0   | -2.5  | -6.5  | 87   | 27  | 148  |
| South Africa                   | AFR | 1185 | 1.1   | -8.0  | -9.1  | 1730 | 530 | 2931 |
| Sri Lanka                      | SAR | 339  | 3.5   | -4.6  | -8.1  | 441  | 135 | 747  |
| St. Lucia                      | LAC | 2    | 3.2   | -16.9 | -20.1 | 7    | 2   | 12   |
| St. Vincent and the Grenadines | LAC | 2    | 2.3   | -7.0  | -9.3  | 2    | 1   | 4    |
| Suriname                       | LAC | 11   | 2.5   | -13.1 | -15.6 | 27   | 8   | 45   |
| Thailand                       | EAP | 725  | 3.0   | -7.1  | -10.2 | 1183 | 362 | 2004 |
| Tonga                          | EAP | 3    | 3.7   | -2.5  | -6.2  | 3    | 1   | 4    |
| Turkey                         | ECA | 1318 | 3.0   | -5.0  | -8.0  | 1689 | 517 | 2861 |
| Turkmenistan                   | ECA | 139  | 6.0   | 1.8   | -4.3  | 95   | 29  | 161  |
| Venezuela, RB                  | LAC | 528  | -10.0 | -25.0 | -15.0 | 1273 | 390 | 2155 |

<sup>a</sup> The country classification into income and region groups follows the World Bank classification for fiscal year 2021. AFR = sub-Saharan Africa; EAP = East Asia and Pacific; ECA = European and Central Asia; LAC = Latin America and Caribbean; MNA = Middle East and North Africa SAR = South Asia;

<sup>b</sup> Number of births projected by the United Nations World Population Prospects 2019.

<sup>c</sup> Projections by the IMF World Economic Outlook for 2020.

# BMJ Open

**How many infants may have died in low- and middle-income countries in 2020 due to the economic contraction accompanying the COVID-19 pandemic? Mortality projections based on forecasted declines in economic growth**

|                                 |                                                                                                                                                |
|---------------------------------|------------------------------------------------------------------------------------------------------------------------------------------------|
| Journal:                        | <i>BMJ Open</i>                                                                                                                                |
| Manuscript ID                   | bmjopen-2021-050551.R1                                                                                                                         |
| Article Type:                   | Original research                                                                                                                              |
| Date Submitted by the Author:   | 08-Jun-2021                                                                                                                                    |
| Complete List of Authors:       | Shapira, Gil; World Bank, Development Research Group<br>de Walque, Damien; World Bank<br>Friedman, Jed; World Bank, Development Research Group |
| <b>Primary Subject Heading</b>: | Global health                                                                                                                                  |
| Secondary Subject Heading:      | Health policy                                                                                                                                  |
| Keywords:                       | COVID-19, HEALTH ECONOMICS, Health policy < HEALTH SERVICES ADMINISTRATION & MANAGEMENT                                                        |
|                                 |                                                                                                                                                |

SCHOLARONE™  
Manuscripts



I, the Submitting Author has the right to grant and does grant on behalf of all authors of the Work (as defined in the below author licence), an exclusive licence and/or a non-exclusive licence for contributions from authors who are: i) UK Crown employees; ii) where BMJ has agreed a CC-BY licence shall apply, and/or iii) in accordance with the terms applicable for US Federal Government officers or employees acting as part of their official duties; on a worldwide, perpetual, irrevocable, royalty-free basis to BMJ Publishing Group Ltd ("BMJ") its licensees and where the relevant Journal is co-owned by BMJ to the co-owners of the Journal, to publish the Work in this journal and any other BMJ products and to exploit all rights, as set out in our [licence](#).

The Submitting Author accepts and understands that any supply made under these terms is made by BMJ to the Submitting Author unless you are acting as an employee on behalf of your employer or a postgraduate student of an affiliated institution which is paying any applicable article publishing charge ("APC") for Open Access articles. Where the Submitting Author wishes to make the Work available on an Open Access basis (and intends to pay the relevant APC), the terms of reuse of such Open Access shall be governed by a Creative Commons licence – details of these licences and which [Creative Commons](#) licence will apply to this Work are set out in our licence referred to above.

Other than as permitted in any relevant BMJ Author's Self Archiving Policies, I confirm this Work has not been accepted for publication elsewhere, is not being considered for publication elsewhere and does not duplicate material already published. I confirm all authors consent to publication of this Work and authorise the granting of this licence.

# How many infants may have died in low- and middle-income countries in 2020 due to the economic contraction accompanying the COVID-19 pandemic? Mortality projections based on forecasted declines in economic growth

Gil Shapira, PhD. Development Research Group, World Bank. [gshapira@worldbank.org](mailto:gshapira@worldbank.org).  
Damien de Walque, PhD. Development Research Group, World Bank.  
Jed Friedman, PhD. Development Research Group, World Bank.

## Abstract

**Objectives:** While COVID-19 has a relatively small direct impact on infant mortality, the pandemic is expected to indirectly increase mortality of this vulnerable group in low- and middle-income countries through its effects on the economy and health system performance. Previous studies projected indirect mortality by modelling how hypothesized disruptions in health services will affect health outcomes. We provide alternative projections, relying on modelling the relationship between aggregate income shocks and mortality.

**Design:** We construct a sample of 5.2 million births by pooling retrospective birth histories reported by women in Demographic and Health Surveys conducted in 83 low- and middle-income countries between 1985 and 2018. We employ regression models with country-specific fixed-effects and flexible time trends to estimate the impact of GDP per capita on infant mortality rate. We then use growth projections by the International Monetary Fund to predict the effect of the economic downturn in 2020 on infant mortality.

**Results:** We estimate 267,208 (112,000-422,415) excess infant deaths in 128 countries, corresponding to a 6.8% (2.8%-10.7%) increase in the total number of infant deaths expected in 2020.

**Conclusions:** The findings underscore the vulnerability of infants to the negative income shocks such as those imposed by the COVID-19 pandemic. While efforts towards prevention and treatment of COVID-19 remain paramount, the global community should also strengthen social safety nets and assure continuity of essential health services.

## Strengths and limitations of this study

- To project the impact of the economic downturn associated with the COVID-19 pandemic on infant mortality, our study links GDP per capita data to 5.2 million retrospective birth histories reported in 83 Demographic and Health Surveys (DHS) conducted in low- and middle-income countries between 1985 and 2017.
- While previous projections of indirect mortality, not due to COVID-19 infections but nevertheless caused by the pandemic, have been based on assumptions regarding magnitudes of health service disruptions, our estimates account for additional mechanisms, mainly increased household poverty.
- Our estimates may represent a lower bound of the actual excess mortality if the current economic downturn is accompanied by larger disruptions to provision of essential health services relative to previous downturns.

- 1  
2  
3  
4  
5  
6  
7  
8  
9  
10  
11  
12  
13
- We estimate the short-term impact of GDP fluctuations on mortality while longer-term implications for mortality and other adverse outcomes may also arise.
  - The analysis ascribes the difference between October 2019 and October 2020 economic growth projections for 2020 solely to the pandemic, even though some countries have also experienced other shocks, such as natural disasters or political crises.
- 14  
15  
16  
17  
18  
19  
20  
21  
22  
23  
24  
25  
26  
27  
28  
29  
30  
31  
32  
33  
34  
35  
36  
37  
38  
39  
40  
41  
42  
43  
44  
45  
46  
47  
48  
49  
50  
51  
52  
53  
54  
55  
56  
57  
58  
59  
60

### Correspondence to:

Dr Gil Shapira; gshapira@worldbank.org

## Introduction

Reducing mortality risk in the wake of the COVID-19 pandemic is a paramount public concern. While direct mortality risk as a result of COVID-19 infection has garnered the majority of attention in global media and policy discussions, indirect mortality may be substantial. Health and social policies should not lose sight of excess indirect mortality caused by such factors as the interruption of essential health services and the general economic downturn brought on by the pandemic. This study attempts to quantify the expected indirect mortality over the pandemic period for one especially vulnerable sub-population – infants – by modeling the impact of projected economic decline on the likelihood of infant survival.

Studies from diverse settings find negligible direct mortality rates for children and infants due to COVID-19 (1). However, stringent containment measures and the ensuing economic downturn, as well as the need to reallocate health system resources towards pandemic response, have influenced many social determinants of mortality such as the ability to afford nutritious foods and to access essential health care. Unlike economic crises in high income countries, which appear to lower mortality (2), economic crises in low-income countries generally increase mortality among vulnerable groups, namely young children and the elderly. Earlier studies have documented a robust relationship between short-term fluctuation in aggregate income and all-cause infant mortality in low- and middle-income countries (3) (4) (5) (6) (7) (8).

At the very start of the COVID-19 pandemic, modelling exercises predicted that the interruption of essential health services will be severe (9) (10) (11) (12) (13) (14) and perhaps the world will experience 250,000 to 1.15 million young child deaths (15) in the first six months of the pandemic. Recent studies indicate that barriers to access essential health care in low- and middle-income are not just a theoretical concern documenting, for example, disruptions in immunization services in Pakistan and Sierra Leone (16) (17), and access to primary care in sub-Saharan Africa (18) (19). At the same time, the global economy is expected to contract 4.9% in the first year of the pandemic (20) and the global poverty count is projected to increase by 120 million people (21). Based on historical data, this economic decline is likely to be associated with higher mortality in excess of COVID-19 fatalities (22), especially in developing economies and will create food insecurity (23) and lower the affordability among vulnerable households of key goods and services necessary for child survival.

In this study, we estimate the impact of the economic downturn on infant mortality by modelling the relationship between GDP fluctuations and infant mortality, following the approach of Baird et al (2011) (5). We link GDP per capita data to 5.2 million retrospective birth histories reported in 83 Demographic and Health Surveys (DHS) conducted in low- and middle-income countries between 1985 and 2017. Then, we use growth projections by International Monetary Fund (IMF) World Economic Outlook (WEO) to predict the effect of the economic downturn in 2020 on infant mortality.

## Data and Methods

To estimate the impact of changes in aggregate income on infant mortality, we rely on two sources of data. Data on GDP per capita is taken from the World Development Indicators. We use values adjusted for purchasing power parity, corresponding to 2011 US dollars. Data on infant mortality are constructed from retrospective birth history reports in all Demographic and Health Surveys conducted in 83 low- and middle-income countries between 1985 and 2018. The surveys used in the analysis are listed in Table A1 in the appendix. The combined sample totals 5.2 million births, of which 27 and 55 percent are from low- and lower-middle income countries. The sample's infant mortality rate per 1000 births is 85, 61 and 37 for low-, lower-middle and upper-middle income countries respectively.



We estimate the relation between aggregate income change and infant mortality with the following framework:

$$D_{ict} = \alpha_c + \beta \log GDP_{ct} + \gamma_{1c} t_{ct} + \gamma_{2c} t_{ct}^2 + \gamma_{3c} t_{ct}^3 + \varepsilon_{ict}$$

$D_{ict}$  is a binary indicator taking the value 1 if child  $i$  in country  $c$  died in the first 12 months of life during year  $t$ .  $\log GDP$  is the natural logarithm of per capita GDP, and  $\varepsilon_{iact}$  is the error term. The  $\alpha$  and  $\gamma$  coefficients identify country-specific fixed effects and a country-specific cubic time trend, respectively. Standard errors are clustered at the country level. We estimate the semi-elasticity of infant mortality to aggregate income decline separately by country income level, as classified by the World Bank 2020 income groups, as well as overall. Low-income economies are defined by a gross national income (GNI) per capita of less than 1,035 USD in 2019. Lower middle-income economies are defined by a GNI between 1,036 and 4,045 USD and the range for upper middle-income economies is between 4,046 and 12,535 USD. To explore the robustness of the findings, both we and Baird et al. (2011) (5) find appreciably similar results with linear or quadratic time trends, as well as alternative recall periods for births (5 or 15 years as opposed to the default 10 years).

As a projection of the aggregate income shock in each country, we compare growth predictions for the same calendar period made before and then during the pandemic. Specifically, we use the IMF WEO 2020 growth rates projected in October 2019 and in October 2020. We define the difference between the two projections as the growth shortfall that is likely attributed to the pandemic and the ensuing economic crisis. Between October 2019 and October 2020, the IMF revised downwards the growth projections for all countries. The average shortfall for lower- and middle-income countries is 9.3 percent. The average projected shortfall in low-income countries, 5.9 percent, is less than half of the projected average shortfall in upper-middle income countries, 12.5 percent.

To calculate the number of excess infant deaths that were likely caused by the pandemic in each country, we multiply the projected growth shortfalls with the  $\beta$  coefficient from the regression specification above. We then multiply by the projected number of births in each country, taken from the United Nation's World Population Prospects 2019. The total number of births are projected for the five-year period 2015-2020 and we assume equal proportion of births for each year. (The projections are available at [population.un.org/wpp](http://population.un.org/wpp).)

## Patient and Public Involvement

The study presents analysis of secondary data. There was no patient and public involvement.

## Results

### Estimation of the GDP-Mortality relationship

The regression coefficient estimates are presented in Table 1. A 1% decrease in GDP per capita is associated with a 0.23 increase in infant mortality per 1,000 children born in low- and middle-income countries. These estimates vary substantially by income group. A 1% decrease in per capita GDP is associated with increases of 0.48, 0.24 and 0.16 in infant mortality per 1,000 children born in low- lower-middle- and upper-middle-income countries, respectively.

Our estimate for the relationship between GDP and infant mortality is significantly lower than the estimate presented in Baird, Friedman and Schady (2011), using the same specification (5). This previous analysis estimated that a 1% decrease in GDP per capita is associated with a 0.40 increase in infant

mortality per 1000 children born in low- and middle-income countries. Two things might drive this difference. First, we have a different composition of countries given that more DHS datasets are available. Our analysis includes 83 countries relative to 59 in the earlier paper. Second, resiliency to income shocks may have improved over time through higher average household incomes and more developed health systems.

## Projection of excess infant mortality in 2020

In Table 2, we report the estimated excess infant mortality in 128 low- and middle-income countries, along with 95% confidence interval around the estimate. The results by income group and region presented in Table 2 are aggregations of the country level projections presented in Appendix Table A2. In total, we estimate 267,208 (112,000-422,415) excess infant deaths in lower- and middle-income countries due to the growth shortfall in 2020. Most of the excess mortality is estimated to occur in the 46 lower-middle income countries, even though the income-mortality semi-elasticity in low-income countries (LIC) is almost twice the size of that in lower-middle income countries (LMIC). This is explained both by the fact that there are more countries and more populous countries in the LMIC group and because the IMF projects larger growth shortfalls in that group. It is worth noting that more than a third of the excess infant mortality is projected to be in India (99,642). India has the highest number of annual births (24,238,000) as well as a particularly large projected shortfall of -17.3%. Because of this, South Asia is the region with the highest expected excess infant mortality although there are only 8 countries included in the analysis. Nigeria and China are a distant second and third with projected excess infant deaths of 11,904 and 10,835.

To benchmark our projections of excess infant deaths, we assess the percentage increase in infant mortality these additional deaths represent. To that end, we calculate the expected infant mortality in the absence of the pandemic for the 128 countries. According to the World Bank's World Development Indicators, estimated infant mortality rates in low-, lower-middle, and upper-middle countries were 48, 37 and 11 deaths per 1000 live births in 2019. We multiply these rates by the annual number of births in each country to forecast a total of 3,953,466 deaths. Assuming that infant mortality rate in 2020 would have been similar to that in 2019 if the COVID-19 outbreak hasn't occurred, the excess deaths we project correspond to an increase of 6.8 (2.8-10.7) percent in the total number of expected infant deaths.

## Discussion

In this study, we have assessed the potential impact of the 2020 economic downturn caused by the COVID-19 pandemic on infant mortality – we estimate almost 270,000 excess infant deaths in the 12 months following the pandemic start. A useful comparison point to this estimate is the 28,000 to 50,000 excess infant deaths estimated for Africa after the financial crisis in 2009 (7). Our Africa estimate in 2020 is 82,239 (37,858-126,620) infant deaths. This higher projection reflects the larger estimated GDP shortfalls. Several mechanisms are likely driving this increase in mortality among children aged 0-1: impoverishment at the household level will lead to worse nutrition and care practices for infants and reduced ability to access health services, while the economic crisis might also affect the supply and quality of services offered by the health systems (19). It is difficult to compare our estimates with other projections focusing on health system disruption as the main driver as the methodology, the age ranges, and the time period are different. The most comparable study, with a focus on child mortality, predicts 253,500 to 1,157,000 additional under-5 child deaths over the first six months of the pandemic, depending on the scenario severity (15).

1  
2  
3 Our estimates of excess infant mortality are not additional to previous projections but serve as an  
4 alternative. Our reduced form approach yields estimates that already incorporate at least some  
5 consequences of reduced utilization of health services, i.e those reductions that have historically arose  
6 during severe economic downturns. Our estimates also directly account for other mechanisms, mainly  
7 increased poverty. As past economic crises were not driven by a pandemic, it is possible that the world  
8 will experience a higher indirect mortality shock than implied by the historic income-mortality semi-  
9 elasticity if the current economic downturn is accompanied by more severe disruptions to the supply of  
10 effective health services. Therefore, our projections may provide a lower bound of actual indirect  
11 mortality. On the other hand, the projections reported in this paper ascribe the difference between the  
12 WEO October 2019 and October 2020 economic growth projections for 2020 solely to the pandemic,  
13 even though some countries have also experienced other shocks, such as natural disasters or political  
14 crises.  
15

16  
17 One limitation of our analysis is that it relies on retrospective birth histories in Demographic and Health  
18 Surveys. In the absence of comprehensive and robust vital registration statistics in most of the countries  
19 included in this analysis, this is likely the most comprehensive data source available. However, such  
20 household survey data can be affected by recall bias, especially for birth and deaths occurring long before  
21 the survey date. For this reason, we have explored the stability of estimates to alternative birth recall  
22 periods and find appreciably similar results. Another limitation is that we only consider the short-term  
23 impact of GDP fluctuations on mortality while longer-term consequences might also exist. Longer-term  
24 impacts on the number of infant deaths could also occur through changes in fertility behavior but should  
25 not affect our projections for 2020. Although COVID-19 was first detected in the end of 2019, the  
26 outbreak was declared as pandemic only in March 2020. If there were impacts on fertility, they would  
27 impact births and infant mortality in 2021.  
28  
29  
30

31 Regarding the reported confidence intervals for projected excess infant deaths in Table 2, note that these  
32 bounds may be regarded as conservative. This is because we first apply the 5<sup>th</sup> percentile lower bound and  
33 then the 95<sup>th</sup> percentile upper bound estimate of the mortality semi-elasticity to the projected growth  
34 contractions for all countries in order to estimate the bounds, thus imposing a perfect correlation of semi-  
35 elasticities across countries. If instead, each country receives its own independent draw from the  
36 distribution of semi-elasticities then there will be significantly tighter confidence bounds in expectation.  
37  
38

39 On the other hand, there may also be forecast error in either the country-level economic growth  
40 projections or in the projections of number of births, which is not directly modeled. Previous literature  
41 suggests these forecast errors have an expected mean of zero, with most deviations from forecast on the  
42 order of plus/minus one percentage point of economic growth or plus/minus three percent of total births  
43 (24) (25). To explore further the role of uncertainty in economic and demographic projections, we  
44 consider Monte Carlo simulations that model country-specific growth and birth projections with a slightly  
45 larger anticipated degree of error. Specifically, we simulate a draw for each country from growth  
46 projections that are uniformly distributed around the projection at +/- 1.5 percentage points, and draws for  
47 the birth projection that are uniformly distributed around the projection at +/- 4 percent. After 10,000  
48 simulations we obtain a 95% CI of total excess deaths to be (251588, 283106). substantially narrower  
49 than the reported CI of (112000, 422415). This suggests that uncertainty in the true value of the growth-  
50 IMR semi-elasticity is the most influential parameter driving uncertainty in the projected total number of  
51 indirect infant deaths.  
52  
53  
54  
55  
56  
57  
58  
59  
60

1  
2  
3 Regardless of the exact number of projected deaths, the large number of excess infant deaths estimated in  
4 our analysis underscores the vulnerability of this age group to negative aggregate income shocks such as  
5 those induced by the COVID-19 pandemic. While we focused on the 0-1 age group, our estimates are  
6 suggestive of other vulnerabilities not directly attributable to COVID-19 among other segments of the  
7 population such as children aged 1-5, pregnant women, and the elderly. As countries, health systems, and  
8 the wider global community continue efforts to prevent and treat COVID-19, we should also consider  
9 resources to stabilize health systems and strengthen social safety nets in order to mitigate the human,  
10 social and economic consequences of the pandemic and related lockdown policies.  
11  
12  
13  
14

### 15 **Declaration of interests**

16 We declare no competing interests.  
17

### 18 **Funding**

19 This study did not require funding.  
20  
21

### 22 **Data availability**

23 Requests to access the data can be submitted on the Demographic and Health Surveys Program at  
24 dhsprogram.com.  
25  
26

### 27 **Ethics Statement**

28 Ethics approval was not sought as the study presents results of an analysis of secondary data and does not  
29 involve human participants.  
30  
31

### 32 **Contributor Statement**

33 All authors contributed to the conceptualization, design of the methodology and the writing. GS  
34 conducted the formal analysis and JF and GS validated the results.  
35  
36

### 37 **Acknowledgments**

38 We gratefully acknowledge the excellent support provided by Salome Drouard as a research assistant.  
39 The findings, interpretations, and conclusions expressed in this paper are entirely those of the authors and  
40 do not necessarily represent the views of the World Bank, its executive directors, of the governments of  
41 the countries they represent.

42 ~~BMJ Open: first published as 10.1136/bmjopen-2020-025111 on 12 October 2020. Protected by copyright.~~  
43  
44  
45  
46  
47  
48  
49  
50  
51  
52  
53  
54  
55  
56  
57  
58  
59  
60

## References

1. *Assessing the age specificity of infection fatality rates for COVID-19: systematic review, meta-analysis, and public policy implications.* **Levin, Andrew T., William P. Hanage, Nana Owusu-Boaitey, Kensington B. Cochran, Seamus P. Walsh, and Gideon Meyerowitz-Katz.** 2020, *European journal of epidemiology*, pp. 1-16.
2. *Health effects of economic crises.* **Ruhm, Christopher J.** 2016, *Health Economics*, pp. 6-24.
3. *Wealthier is Healthier.* **Pritchett, Lant, and Lawrence H. Summers.** 1996, *Journal of Human Resources*, pp. 841-868.
4. *Fatal fluctuations? Cyclicity in infant mortality in India.* **Bhalotra, Sonia.** 2010, *Journal of Development Economics*, pp. 7-19.
5. *Aggregate income shocks and infant mortality in the developing world.* **Baird, Sarah, Jed Friedman, and Norbert Schady.** 2011, *Review of Economics and statistics*, pp. 847-856.
6. *Economic crises, maternal and infant mortality, low birth weight and enrollment rates: evidence from Argentina's downturns.* **Cruces, Guillermo, Pablo Glüzmann, and Luis Felipe López Calva.** 2012, *World Development*, pp. 303-314.
7. *How many infants likely died in Africa as a result of the 2008–2009 global financial crisis?* **Friedman, Jed, and Norbert Schady.** 2013, *Health Economics*, pp. 611-622.
8. *Effects of economic downturns on child mortality: a global economic analysis, 1981–2010.* **Maruthappu, Mahiben, Robert A. Watson, Johnathan Watkins, Thomas Zeltner, Rosalind Raine, and Rifat Atun.** 2017, *BMJ global health*.
9. *Routine childhood immunisation during the COVID-19 pandemic in Africa: a benefit–risk analysis of health benefits versus excess risk of SARS-CoV-2 infection.* **Abbas, Kaja, Simon R. Procter, Kevin van Zandvoort, Andrew Clark, Sebastian Funk, Tewodaj Mengistu, Dan Hogan et al.** 10, 2020, *The Lancet Global Health*, Vol. 8, pp. e1264-e1272.
10. *Potential impact of the COVID-19 pandemic on HIV, tuberculosis, and malaria in low-income and middle-income countries: a modelling study.* **Hogan, Alexandra B., Britta L. Jewell, Ellie Sherrard-Smith, Juan F. Vesga, Oliver J. Watson, Charles Whittaker, Arran Hamlet et al.** 10, 2020, *The Lancet Global Health*, Vol. 8, pp. e1132-e1141.
11. *Potential effects of disruption to HIV programmes in sub-Saharan Africa caused by COVID-19: results from multiple mathematical models.* **Jewell, Britta L., Edinah Mudimu, John Stover, Debra Ten Brink, Andrew N. Phillips, Jennifer A. Smith, Rowan Martin-Hughes et al.** 9, 2020, *The Lancet HIV*, Vol. 7, pp. e629-e640.
12. *The potential public health consequences of COVID-19 on malaria in Africa.* **Sherrard-Smith, Ellie, Alexandra B. Hogan, Arran Hamlet, Oliver J. Watson, Charlie Whittaker, Peter Winskill, Fatima Ali et al.** 1, 2020, *Nature medicine*, Vol. 26, pp. 1411-1416.
13. **Organization, World Health.** *Pulse survey on continuity of essential health services during the COVID-19 pandemic.* 2020.

14. *The impact of the COVID-19 pandemic on maternal and perinatal health: a scoping review.* **Kotlar, Bethany, Emily Gerson, Sophia Petrillo, Ana Langer, and Henning Tiemeier.** 1, 2021, Vol. 18.
15. *Early estimates of the indirect effects of the COVID-19 pandemic on maternal and child mortality in low-income and middle-income countries: a modelling study.* **Roberton, Timothy, Emily D. Carter, Victoria B. Chou, Angela R. Stegmuller, Bianca D. Jackson, Yvonne Tam, Talata Sawadogo-Lewis, and Neff Walker.** 7, 2020, The Lancet Global Health, Vol. 8, pp. e901-e908.
16. *Impact of COVID-19 pandemic response on uptake of routine immunizations in Sindh, Pakistan: an analysis of provincial electronic immunization registry data.* **Chandir, Subhash, Danya Arif Siddiqi, Mariam Mehmood, Hamidreza Setayesh, Muhammad Siddique, Amna Mirza, Riswana Soundardjee et al.** 45, 2020, Vaccine , Vol. 38, pp. 7146-7155.
17. *Child healthcare and immunizations in sub-Saharan Africa during the COVID-19 pandemic.* **Buonsenso, Danilo, Bianca Cinicola, Memenatu Ngaima Kallon, and Francesco Iodice.** *Frontiers in pediatrics*, p. 517.
18. *Access to primary healthcare during lockdown measures for COVID-19 in rural South Africa: an interrupted time series analysis.* **Siedner, Mark J., John D. Kraemer, Mark J. Meyer, Guy Harling, Thobeka Mngomezulu, Patrick Gabela, Siphephelo Dlamini et al.** 2020, BMJ open.
19. *Disruptions in maternal and child health service utilization service utilization during COVID-19: analysis from eight sub-Saharan African countries.* **Shapira, Gil, et al.** s.l. : Health Policy and Planning, 2021.
20. **Fund, International Monetary.** *World Economic Outlook, October 2020: A Long and Difficult Ascent.* . 2020.
21. **Christoph Lakner, Nishant Yonzandaniel Gerszon Mahlerr. Andres Castanesa and Aguilarhaoyu Wu.** Updated estimates of the impact of COVID-19 on global poverty: Looking back at 2020 and the outlook for 2021.
22. **Doerr, Sebastian, and Boris Hofmann.** *The recession-mortality nexus and Covid-19.* s.l. : Bank of International Settlements, 2020.
23. *Falling living standards during the COVID-19 crisis: Quantitative evidence from nine developing countries.* **Dennis Egger, Edward Miguel, Shana S. Warren, Ashish Shenoy, Elliott Collins, Dean Karlan, Doug Parkerson, A. Mushfiq Mobarak, Günther Fink, Christopher Udry, Michael Walker, Johanness Haushofer, Magdalena Larrebourg, Susan Athey, Paula Lopez-Pena, Salim B.** 2021, Science Advances.
24. *Forecasts in times of crises.* **Eicher, Theo S., David J. Kuenzel, Chris Papageorgiou, and Charis Christofides.** 3, s.l. : International Journal of Forecasting, 2019, Vol. 35.
25. *Data quality and accuracy of United Nations population projections.* **Keilman, Nico.** 2, s.l. : Population Studies, Vol. 55.

## Tables

**Table 1: Estimated relationship between aggregate income shocks and infant mortality rate per 1,000 children, by World Bank country income groups**

| Low-income countries | Lower-middle-income countries | Upper-middle-income countries | Low- and middle-income countries |
|----------------------|-------------------------------|-------------------------------|----------------------------------|
| -47.85***<br>(17.71) | -23.73***<br>(5.50)           | -16.08***<br>(6.80)           | -23.12***<br>(9.38)              |

Source: authors' estimation using data from Demographic and Health surveys and World Development Indicators

Notes: Overall number of observed births is 5,273,350. The table presents coefficient estimates from regressions of infant mortality log per capita GDP with time trends and country fixed effects. Standard errors are presented in parentheses. There are four income groupings for countries; the country income groups follow the World Bank classification for fiscal year 2021.

\* p<0.10, \*\* p<0.05, \*\*\* p<0.01.

**Table 2: Projected excess infant deaths with 95% confidence intervals, by World Bank country income groups and regions**

|                                 | Estimate | 95% CI            | Countries |
|---------------------------------|----------|-------------------|-----------|
| <b>Total</b>                    | 267,318  | 112,000 – 422,415 | 128       |
| <b>By income group:</b>         |          |                   |           |
| Low-income economies            | 65,628   | 18,013-113,241    | 29        |
| Lower-middle income economies   | 158,638  | 86,646-230,628    | 46        |
| Upper-middle income economies   | 42,942   | 7,340-78,544      | 53        |
| <b>By region:</b>               |          |                   |           |
| Sub-Saharan Africa              | 82,239   | 29,198-135,280    | 48        |
| East Asia and Pacific           | 32,537   | 12,899-52,174     | 19        |
| Europe and Central Asia         | 2,962    | 2,372-13,553      | 20        |
| Latin America and the Caribbean | 17,202   | 3,628-30,776      | 23        |
| Middle East and North Africa    | 14,127   | 4,067-24,187      | 10        |
| South Asia                      | 113,141  | 59,836-166,446    | 8         |

Source: authors' projections based on estimated parameters presented in Table 1 and data from IMF World Economic Outlook and World Population Prospects.

Notes: The definitions of income groups and regions are based on the World Bank country group categorization for the 2021 fiscal year.

**Appendix Table A1: Demographic and Health Surveys datasets used in the analysis**

| Low-income                              | Lower-middle income                                      | Upper-middle income                                         |
|-----------------------------------------|----------------------------------------------------------|-------------------------------------------------------------|
| Afghanistan 2015                        | Angola 2016                                              | Albania 2009, 2018                                          |
| Benin 1996, 2001, 2006, 2012, 2018      | Bangladesh 1994, 1997, 2000, 2004, 2007, 2011, 2014      | Armenia 2000, 2005, 2010, 2016                              |
| Burkina Faso 1993, 1999, 2003, 2010     | Bolivia 1989, 1994, 1998, 2004, 2008                     | Azerbaijan 2006                                             |
| Burundi 1987, 2011, 2017                | Cambodia 2000, 2006, 2011, 2014                          | Brazil 1986, 1992, 1996                                     |
| Central African Republic 1995           | Cameroon 1991, 1998, 2004, 2011, 2018                    | Colombia 1986, 1990, 1995, 2000, 2005, 2010, 2016           |
| DRC 2007, 2014                          | Comoros 1996, 2012                                       | Dominican Republic 1986, 1991, 1996, 1999, 2002, 2007, 2013 |
| Ethiopia 2000, 2005, 2011, 2016         | Republic of Congo 2005, 2012                             | Ecuador 1987                                                |
| Gambia 2013                             | Cote d'Ivoire 1994, 1999, 2012                           | Gabon 2001, 2012                                            |
| Guinea 1999, 2005, 2012, 2018           | Egypt 1989, 1993, 1996, 2003, 2005, 2008, 2014           | Guatemala 1987, 1995, 1999, 2015                            |
| Haiti 1995, 2000, 2006, 2012, 2017      | El Salvador 1985                                         | Guyana 2009                                                 |
| Liberia 2007, 2013                      | Eswatini 2007                                            | Jordan 1990, 1997, 2002, 2007, 2012, 2018                   |
| Madagascar 1992, 1997, 2004, 2009       | Ghana 1988, 1994, 2003, 2008, 2014                       | Kazakhstan 1995, 1999                                       |
| Malawi 1992, 2000, 2005, 2010, 2016     | Honduras 2006, 2012                                      | Maldives 2009, 2017                                         |
| Mali 1987, 1996, 2001, 2006, 2013, 2018 | India 1993, 1999, 2006, 2016                             | Mexico 1987                                                 |
| Mozambique 1997, 2004, 2011, 2015       | Indonesia 1987, 1991, 1994, 1997, 2003, 2007, 2012, 2017 | Namibia 1992, 2000, 2007, 2013                              |
| Nepal 1997, 2001, 2006, 2011, 2017      | Kenya 1989, 1993, 1998, 2003, 2009, 2014                 | Paraguay 1990                                               |
| Niger 1992, 1998, 2006, 2012            | Kyrgyz Republic 1997, 2012                               | Peru 1986, 1992, 1996, 2000, 2004-2012*                     |
| Rwanda 1992, 2000, 2008, 2011, 2015     | Lesotho 2005, 2010, 2014                                 |                                                             |
| Sierra Leone 2008, 2013                 | Moldova 2005                                             |                                                             |
| Tajikistan 2012, 2017                   | Morocco 1987, 1992, 2004                                 |                                                             |
| Tanzania 1999, 2005, 2012, 2016         | Myanmar 2016                                             |                                                             |
| Togo 1988, 1998, 2014                   | Nicaragua 1998, 2001                                     |                                                             |
| Uganda 1989, 1995, 2001, 2006           | Nigeria 1990, 2003, 2008, 2013, 2018                     |                                                             |
| Yemen 1992, 2013                        | Pakistan 1991, 2007, 2013, 2018                          |                                                             |
|                                         | Papua New Guinea 2018                                    |                                                             |
|                                         | Philippines 1993, 1998, 2003, 2008, 2013, 2017           |                                                             |
|                                         | Sao Tome and Principe 2009                               |                                                             |
|                                         | Senegal 1986, 1993, 1997, 2011, 2012-2018*               |                                                             |
|                                         | Sudan 1990                                               |                                                             |
|                                         | Timor Leste 2010, 2016                                   |                                                             |
|                                         | Tunisia 1988                                             |                                                             |
|                                         | Ukraine 2007                                             |                                                             |
|                                         | Uzbekistan 1996                                          |                                                             |
|                                         | Vietnam 1997, 2002                                       |                                                             |
|                                         | Zambia 1992, 1997, 2002, 2007, 2014, 2018                |                                                             |
|                                         | Zimbabwe 1989, 1994, 1999, 2006, 2011, 2015              |                                                             |

Notes: The years denote the timing of survey implementation in each country. Some surveys spanned over more than one calendar year. In these cases, the last year of the survey is indicated. For the analysis, retrospective birth histories are used to create birth and infant mortality data for the 11 years preceding each survey.

\* Senegal and Peru had special continuous surveys. Peru had annual survey between 2004 and 2012 and Senegal completed annual surveys between 2012 to 2018.



Appendix Table A2: Projections of growth shortfall and excess infant mortality in lower- and middle-income countries

| Country                                             | Region <sup>a</sup> | Number of annual birth 2015-2020 (in thousands) <sup>b</sup> | WEO projections of 2020 growth <sup>c</sup> |                         |                  | Excess mortality projection |                 |                  |
|-----------------------------------------------------|---------------------|--------------------------------------------------------------|---------------------------------------------|-------------------------|------------------|-----------------------------|-----------------|------------------|
|                                                     |                     |                                                              | October 2019 projection                     | October 2020 projection | Growth Shortfall | estimate                    | 95% lower bound | 95% higher bound |
| <b>Panel A: Lower Income Economies <sup>a</sup></b> |                     |                                                              |                                             |                         |                  |                             |                 |                  |
| Afghanistan                                         | SAR                 | 1205                                                         | 3.5                                         | -5.0                    | -8.5             | 4888                        | 1342            | 8434             |
| Benin                                               | AFR                 | 413                                                          | 6.7                                         | 2.0                     | -4.7             | 930                         | 255             | 1604             |
| Burkina Faso                                        | AFR                 | 745                                                          | 6.0                                         | -2.0                    | -8.0             | 2852                        | 783             | 4920             |
| Burundi                                             | AFR                 | 433                                                          | 0.5                                         | -3.2                    | -3.7             | 775                         | 213             | 1338             |
| Central African Republic                            | AFR                 | 165                                                          | 5.0                                         | -1.0                    | -5.9             | 468                         | 128             | 807              |
| Chad                                                | AFR                 | 648                                                          | 5.4                                         | -0.7                    | -6.1             | 1894                        | 520             | 3267             |
| Congo, Dem. Rep.                                    | AFR                 | 3434                                                         | 3.9                                         | -2.2                    | -6.0             | 9925                        | 2724            | 17126            |
| Eritrea                                             | AFR                 | 106                                                          | 3.9                                         | -0.6                    | -4.5             | 226                         | 62              | 391              |
| Ethiopia                                            | AFR                 | 3514                                                         | 7.2                                         | 1.9                     | -5.3             | 8832                        | 2424            | 15240            |
| Gambia, The                                         | AFR                 | 87                                                           | 6.4                                         | -1.8                    | -8.2             | 343                         | 94              | 591              |
| Guinea                                              | AFR                 | 449                                                          | 6.0                                         | 1.4                     | -4.5             | 970                         | 266             | 1673             |
| Guinea-Bissau                                       | AFR                 | 66                                                           | 4.9                                         | -2.9                    | -7.8             | 245                         | 67              | 422              |
| Haiti                                               | LAC                 | 271                                                          | 1.2                                         | -4.0                    | -5.2             | 674                         | 185             | 1164             |
| Liberia                                             | AFR                 | 158                                                          | 1.6                                         | -3.0                    | -4.6             | 345                         | 95              | 596              |
| Madagascar                                          | AFR                 | 852                                                          | 5.3                                         | -3.2                    | -8.5             | 3454                        | 948             | 5960             |
| Malawi                                              | AFR                 | 614                                                          | 5.1                                         | 0.6                     | -4.5             | 1323                        | 363             | 2283             |
| Mali                                                | AFR                 | 787                                                          | 5.0                                         | -2.0                    | -7.0             | 2631                        | 722             | 4540             |
| Mozambique                                          | AFR                 | 1099                                                         | 6.0                                         | -0.5                    | -6.5             | 3441                        | 944             | 5937             |
| Nepal                                               | SAR                 | 562                                                          | 6.3                                         | 0.0                     | -6.3             | 1681                        | 461             | 2900             |
| Niger                                               | AFR                 | 1023                                                         | 6.1                                         | 0.5                     | -5.6             | 2717                        | 746             | 4688             |
| Rwanda                                              | AFR                 | 390                                                          | 8.1                                         | 2.0                     | -6.1             | 1142                        | 313             | 1970             |
| Sierra Leone                                        | AFR                 | 255                                                          | 4.7                                         | -3.1                    | -7.7             | 945                         | 260             | 1631             |
| Somalia                                             | AFR                 | 622                                                          | 3.2                                         | -1.5                    | -4.7             | 1398                        | 384             | 2412             |
| South Sudan                                         | AFR                 | 386                                                          | 8.2                                         | 4.1                     | -4.1             | 757                         | 208             | 1306             |
| Tajikistan                                          | ECA                 | 281                                                          | 4.5                                         | 1.0                     | -3.5             | 470                         | 129             | 811              |
| Tanzania                                            | AFR                 | 2052                                                         | 5.7                                         | 1.9                     | -3.8             | 3732                        | 1024            | 6440             |
| Togo                                                | AFR                 | 260                                                          | 5.3                                         | 0.0                     | -5.3             | 659                         | 181             | 1137             |
| Uganda                                              | AFR                 | 1614                                                         | 6.2                                         | -0.3                    | -6.5             | 5022                        | 1378            | 8666             |
| Yemen, Rep.                                         | MNA                 | 865                                                          | 2.0                                         | -5.0                    | -7.0             | 2890                        | 793             | 4987             |

| <b>Panel B: Lower-Middle Income Economies <sup>a</sup></b> |     |       |      |       |       |       |       |        |
|------------------------------------------------------------|-----|-------|------|-------|-------|-------|-------|--------|
| Angola                                                     | AFR | 1243  | 1.2  | -4.0  | -5.2  | 1523  | 832   | 2215   |
| Bangladesh                                                 | SAR | 2946  | 7.4  | 3.8   | -3.6  | 2550  | 1393  | 3707   |
| Bhutan                                                     | SAR | 13    | 7.2  | 0.6   | -6.6  | 21    | 11    | 30     |
| Bolivia                                                    | LAC | 247   | 3.8  | -7.9  | -11.7 | 685   | 374   | 996    |
| Cabo Verde                                                 | AFR | 11    | 5.0  | -6.8  | -11.7 | 30    | 16    | 43     |
| Cambodia                                                   | EAP | 366   | 6.8  | -2.8  | -9.5  | 828   | 452   | 1204   |
| Cameroon                                                   | AFR | 887   | 4.2  | -2.8  | -6.9  | 1461  | 798   | 2124   |
| Comoros                                                    | AFR | 26    | 4.2  | -1.8  | -6.1  | 38    | 21    | 55     |
| Congo, Rep.                                                | AFR | 171   | 2.8  | -7.0  | -9.8  | 398   | 217   | 578    |
| Côte d'Ivoire                                              | AFR | 890   | 7.3  | 1.8   | -5.5  | 1161  | 634   | 1688   |
| Djibouti                                                   | AFR | 21    | 6.0  | -1.0  | -7.0  | 34    | 19    | 50     |
| Egypt                                                      | MNA | 2584  | 5.9  | 3.5   | -2.3  | 1424  | 778   | 2070   |
| El Salvador                                                | LAC | 118   | 2.3  | -9.0  | -11.3 | 315   | 172   | 458    |
| Eswatini                                                   | AFR | 30    | 0.5  | -3.5  | -4.0  | 29    | 16    | 41     |
| Ghana                                                      | AFR | 871   | 5.6  | 0.9   | -4.7  | 968   | 529   | 1407   |
| Honduras                                                   | LAC | 207   | 3.5  | -6.6  | -10.1 | 496   | 271   | 721    |
| India                                                      | SAR | 24238 | 7.0  | -10.3 | -17.3 | 99642 | 54424 | 144860 |
| Indonesia                                                  | EAP | 4842  | 5.1  | -1.5  | -6.6  | 7549  | 4123  | 10975  |
| Kenya                                                      | AFR | 1469  | 6.0  | 1.0   | -5.0  | 1743  | 952   | 2533   |
| Kiribati                                                   | EAP | 3     | 2.3  | -1.1  | -3.4  | 3     | 1     | 4      |
| Kyrgyz Republic                                            | ECA | 155   | 3.4  | -12.0 | -15.4 | 566   | 309   | 823    |
| Lao PDR                                                    | EAP | 167   | 6.5  | 0.2   | -6.3  | 250   | 136   | 363    |
| Lesotho                                                    | AFR | 57    | -0.2 | -4.8  | -4.6  | 62    | 34    | 91     |
| Mauritania                                                 | AFR | 147   | 5.9  | -3.2  | -9.1  | 318   | 174   | 463    |
| Micronesia, Fed. Sts.                                      | EAP | 3     | 0.8  | -3.8  | -4.6  | 3     | 2     | 4      |
| Moldova                                                    | ECA | 41    | 3.8  | -4.5  | -8.3  | 81    | 44    | 118    |
| Mongolia                                                   | EAP | 77    | 5.4  | -2.0  | -7.4  | 134   | 73    | 195    |
| Morocco                                                    | MNA | 682   | 3.7  | -7.0  | -10.7 | 1725  | 942   | 2508   |
| Myanmar                                                    | EAP | 948   | 6.3  | 2.0   | -4.3  | 959   | 524   | 1395   |
| Nicaragua                                                  | LAC | 134   | -0.8 | -5.5  | -4.7  | 151   | 82    | 219    |
| Nigeria                                                    | AFR | 7377  | 2.5  | -4.3  | -6.8  | 11904 | 6502  | 17306  |
| Pakistan                                                   | SAR | 5994  | 2.4  | -0.4  | -2.7  | 3891  | 2125  | 5656   |
| Papua New Guinea                                           | EAP | 232   | 2.6  | -3.3  | -5.8  | 322   | 176   | 468    |
| Philippines                                                | EAP | 2178  | 6.2  | -8.3  | -14.4 | 7466  | 4078  | 10855  |

|    |                                                            |     |      |      |       |       |       |      |      |
|----|------------------------------------------------------------|-----|------|------|-------|-------|-------|------|------|
| 1  |                                                            |     |      |      |       |       |       |      |      |
| 2  |                                                            |     |      |      |       |       |       |      |      |
| 3  |                                                            |     |      |      |       |       |       |      |      |
| 4  | Senegal                                                    | AFR | 544  | 6.8  | -0.7  | -7.4  | 961   | 525  | 1397 |
| 5  | Solomon Islands                                            | EAP | 21   | 2.9  | -5.0  | -7.9  | 39    | 21   | 57   |
| 6  | Sudan                                                      | AFR | 1339 | -1.5 | -8.4  | -6.9  | 2182  | 1192 | 3172 |
| 7  | São Tomé and Príncipe                                      | AFR | 7    | 3.5  | -6.5  | -10.0 | 16    | 9    | 23   |
| 8  | Timor-Leste                                                | EAP | 37   | 5.0  | -6.8  | -11.8 | 105   | 57   | 152  |
| 9  | Tunisia                                                    | MNA | 204  | 2.4  | -7.0  | -9.5  | 458   | 250  | 666  |
| 10 | Ukraine                                                    | ECA | 426  | 3.0  | -7.2  | -10.2 | 1032  | 564  | 1500 |
| 11 | Uzbekistan                                                 | ECA | 703  | 6.0  | 0.7   | -5.3  | 884   | 483  | 1285 |
| 12 | Vanuatu                                                    | EAP | 9    | 3.1  | -8.3  | -11.4 | 23    | 13   | 34   |
| 13 | Vietnam                                                    | EAP | 1610 | 6.5  | 1.6   | -4.9  | 1872  | 1023 | 2722 |
| 14 | Zambia                                                     | AFR | 622  | 1.7  | -4.8  | -6.5  | 963   | 526  | 1400 |
| 15 | Zimbabwe                                                   | AFR | 442  | 2.7  | -10.4 | -13.1 | 1375  | 751  | 1999 |
| 16 | Nigeria                                                    | AFR | 7377 | 2.5  | -4.3  | -6.8  | 11904 | 832  | 2215 |
| 17 | Pakistan                                                   | SAR | 5994 | 2.4  | -0.4  | -2.7  | 3891  | 1393 | 3707 |
| 18 | Papua New Guinea                                           | EAP | 232  | 2.6  | -3.3  | -5.8  | 322   | 11   | 30   |
| 19 | Philippines                                                | EAP | 2178 | 6.2  | -8.3  | -14.4 | 7466  | 374  | 996  |
| 20 | Senegal                                                    | AFR | 544  | 6.8  | -0.7  | -7.4  | 961   | 16   | 43   |
| 21 | Solomon Islands                                            | EAP | 21   | 2.9  | -5.0  | -7.9  | 39    | 452  | 1204 |
| 22 | Sudan                                                      | AFR | 1339 | -1.5 | -8.4  | -6.9  | 2182  | 798  | 2124 |
| 23 | São Tomé and Príncipe                                      | AFR | 7    | 3.5  | -6.5  | -10.0 | 16    | 21   | 55   |
| 24 | Timor-Leste                                                | EAP | 37   | 5.0  | -6.8  | -11.8 | 105   | 217  | 578  |
| 25 | Tunisia                                                    | MNA | 204  | 2.4  | -7.0  | -9.5  | 458   | 634  | 1688 |
| 26 | Ukraine                                                    | ECA | 426  | 3.0  | -7.2  | -10.2 | 1032  | 19   | 50   |
| 27 | Uzbekistan                                                 | ECA | 703  | 6.0  | 0.7   | -5.3  | 884   | 778  | 2070 |
| 28 | Vanuatu                                                    | EAP | 9    | 3.1  | -8.3  | -11.4 | 23    | 172  | 458  |
| 29 | Vietnam                                                    | EAP | 1610 | 6.5  | 1.6   | -4.9  | 1872  | 16   | 41   |
| 30 | Zambia                                                     | AFR | 622  | 1.7  | -4.8  | -6.5  | 963   | 529  | 1407 |
| 31 | Zimbabwe                                                   | AFR | 442  | 2.7  | -10.4 | -13.1 | 1375  | 271  | 721  |
| 32 |                                                            |     |      |      |       |       |       |      |      |
| 33 |                                                            |     |      |      |       |       |       |      |      |
| 34 | <b>Panel C: Upper-Middle Income Economies <sup>a</sup></b> |     |      |      |       |       |       |      |      |
| 35 | Albania                                                    | ECA | 34   | 4.0  | -7.5  | -11.6 | 63    | 11   | 116  |
| 36 | Algeria                                                    | MNA | 1032 | 2.4  | -5.5  | -7.9  | 1305  | 223  | 2388 |
| 37 | Argentina                                                  | LAC | 755  | -1.3 | -11.8 | -10.5 | 1276  | 218  | 2333 |
| 38 | Armenia                                                    | ECA | 42   | 4.8  | -4.5  | -9.3  | 62    | 11   | 114  |
| 39 | Azerbaijan                                                 | ECA | 169  | 2.1  | -4.0  | -6.1  | 167   | 28   | 305  |
| 40 | Belarus                                                    | ECA | 112  | 0.3  | -3.0  | -3.3  | 59    | 10   | 108  |
| 41 |                                                            |     |      |      |       |       |       |      |      |
| 42 |                                                            |     |      |      |       |       |       |      |      |
| 43 |                                                            |     |      |      |       |       |       |      |      |
| 44 |                                                            |     |      |      |       |       |       |      |      |
| 45 |                                                            |     |      |      |       |       |       |      |      |
| 46 |                                                            |     |      |      |       |       |       |      |      |
| 47 |                                                            |     |      |      |       |       |       |      |      |

|    |                        |     |       |      |       |       |       |      |       |
|----|------------------------|-----|-------|------|-------|-------|-------|------|-------|
| 1  |                        |     |       |      |       |       |       |      |       |
| 2  |                        |     |       |      |       |       |       |      |       |
| 3  |                        |     |       |      |       |       |       |      |       |
| 4  |                        |     |       |      |       |       |       |      |       |
| 5  |                        |     |       |      |       |       |       |      |       |
| 6  |                        |     |       |      |       |       |       |      |       |
| 7  |                        |     |       |      |       |       |       |      |       |
| 8  |                        |     |       |      |       |       |       |      |       |
| 9  |                        |     |       |      |       |       |       |      |       |
| 10 |                        |     |       |      |       |       |       |      |       |
| 11 |                        |     |       |      |       |       |       |      |       |
| 12 |                        |     |       |      |       |       |       |      |       |
| 13 |                        |     |       |      |       |       |       |      |       |
| 14 |                        |     |       |      |       |       |       |      |       |
| 15 |                        |     |       |      |       |       |       |      |       |
| 16 |                        |     |       |      |       |       |       |      |       |
| 17 |                        |     |       |      |       |       |       |      |       |
| 18 |                        |     |       |      |       |       |       |      |       |
| 19 |                        |     |       |      |       |       |       |      |       |
| 20 |                        |     |       |      |       |       |       |      |       |
| 21 |                        |     |       |      |       |       |       |      |       |
| 22 |                        |     |       |      |       |       |       |      |       |
| 23 |                        |     |       |      |       |       |       |      |       |
| 24 |                        |     |       |      |       |       |       |      |       |
| 25 |                        |     |       |      |       |       |       |      |       |
| 26 |                        |     |       |      |       |       |       |      |       |
| 27 |                        |     |       |      |       |       |       |      |       |
| 28 |                        |     |       |      |       |       |       |      |       |
| 29 |                        |     |       |      |       |       |       |      |       |
| 30 |                        |     |       |      |       |       |       |      |       |
| 31 |                        |     |       |      |       |       |       |      |       |
| 32 |                        |     |       |      |       |       |       |      |       |
| 33 |                        |     |       |      |       |       |       |      |       |
| 34 |                        |     |       |      |       |       |       |      |       |
| 35 |                        |     |       |      |       |       |       |      |       |
| 36 |                        |     |       |      |       |       |       |      |       |
| 37 |                        |     |       |      |       |       |       |      |       |
| 38 |                        |     |       |      |       |       |       |      |       |
| 39 |                        |     |       |      |       |       |       |      |       |
| 40 |                        |     |       |      |       |       |       |      |       |
| 41 |                        |     |       |      |       |       |       |      |       |
| 42 |                        |     |       |      |       |       |       |      |       |
| 43 |                        |     |       |      |       |       |       |      |       |
| 44 |                        |     |       |      |       |       |       |      |       |
| 45 |                        |     |       |      |       |       |       |      |       |
| 46 |                        |     |       |      |       |       |       |      |       |
| 47 |                        |     |       |      |       |       |       |      |       |
|    | Belize                 | LAC | 8     | 2.1  | -16.0 | -18.1 | 23    | 4    | 42    |
|    | Bosnia and Herzegovina | ECA | 27    | 2.6  | -6.5  | -9.1  | 40    | 7    | 74    |
|    | Botswana               | AFR | 56    | 4.3  | -9.6  | -14.0 | 126   | 22   | 231   |
|    | Brazil                 | LAC | 2934  | 2.0  | -5.8  | -7.8  | 3700  | 632  | 6768  |
|    | Bulgaria               | ECA | 63    | 3.2  | -4.0  | -7.2  | 73    | 13   | 134   |
|    | China                  | EAP | 16978 | 5.8  | 1.9   | -4.0  | 10835 | 1852 | 19818 |
|    | Colombia               | LAC | 739   | 3.6  | -8.2  | -11.8 | 1407  | 240  | 2573  |
|    | Costa Rica             | LAC | 70    | 2.5  | -5.5  | -8.0  | 91    | 15   | 166   |
|    | Dominican Republic     | LAC | 208   | 5.2  | -6.0  | -11.2 | 375   | 64   | 686   |
|    | Ecuador                | LAC | 336   | 0.5  | -11.0 | -11.5 | 621   | 106  | 1135  |
|    | Equatorial Guinea      | AFR | 43    | -5.0 | -6.0  | -1.0  | 7     | 1    | 13    |
|    | Fiji                   | EAP | 19    | 3.0  | -21.0 | -24.0 | 73    | 13   | 134   |
|    | Gabon                  | AFR | 67    | 3.4  | -2.7  | -6.1  | 65    | 11   | 120   |
|    | Georgia                | ECA | 54    | 4.8  | -5.0  | -9.8  | 86    | 15   | 157   |
|    | Grenada                | LAC | 2     | 2.7  | -11.8 | -14.5 | 4     | 1    | 8     |
|    | Guatemala              | LAC | 423   | 3.5  | -2.0  | -5.5  | 377   | 64   | 690   |
|    | Guyana                 | LAC | 16    | 85.6 | 26.2  | -59.4 | 149   | 25   | 273   |
|    | Iran                   | MNA | 1552  | 0.0  | -5.0  | -5.0  | 1257  | 215  | 2298  |
|    | Iraq                   | MNA | 1104  | 4.7  | -12.1 | -16.7 | 2972  | 508  | 5436  |
|    | Jamaica                | LAC | 47    | 1.0  | -8.6  | -9.6  | 73    | 13   | 134   |
|    | Jordan                 | MNA | 215   | 2.4  | -5.0  | -7.4  | 255   | 44   | 467   |
|    | Kazakhstan             | ECA | 389   | 3.9  | -2.7  | -6.6  | 413   | 71   | 756   |
|    | Lebanon                | MNA | 117   | 0.9  | -25.0 | -25.9 | 488   | 83   | 893   |
|    | Libya                  | MNA | 126   | 0.0  | -66.7 | -66.6 | 1353  | 231  | 2475  |
|    | Malaysia               | EAP | 527   | 4.4  | -6.0  | -10.4 | 882   | 151  | 1613  |
|    | Maldives               | SAR | 7     | 6.0  | -18.6 | -24.6 | 28    | 5    | 52    |
|    | Mauritius              | AFR | 13    | 3.8  | -14.2 | -18.0 | 38    | 6    | 69    |
|    | Mexico                 | LAC | 2224  | 1.3  | -9.0  | -10.3 | 3670  | 627  | 6713  |
|    | Montenegro             | ECA | 7     | 2.5  | -12.0 | -14.5 | 17    | 3    | 32    |
|    | Namibia                | AFR | 70    | 1.6  | -5.9  | -7.4  | 83    | 14   | 153   |
|    | North Macedonia        | ECA | 23    | 3.4  | -5.4  | -8.8  | 32    | 5    | 58    |
|    | Paraguay               | LAC | 143   | 4.0  | -4.0  | -8.0  | 185   | 32   | 338   |
|    | Peru                   | LAC | 574   | 3.6  | -13.9 | -17.6 | 1621  | 277  | 2966  |
|    | Romania                | ECA | 192   | 3.5  | -4.8  | -8.3  | 256   | 44   | 468   |
|    | Russia                 | ECA | 1858  | 1.9  | -4.1  | -6.0  | 1788  | 306  | 3271  |

1  
2  
3  
4  
5  
6  
7  
8  
9  
10  
11  
12  
13  
14  
15  
16  
17  
18  
19  
20  
21  
22  
23  
24  
25  
26  
27  
28  
29  
30  
31  
32  
33  
34  
35  
36  
37  
38  
39  
40  
41  
42  
43  
44  
45  
46  
47

|                                |     |      |       |       |       |      |     |      |
|--------------------------------|-----|------|-------|-------|-------|------|-----|------|
| Samoa                          | EAP | 5    | 4.4   | -5.0  | -9.4  | 7    | 1   | 13   |
| Serbia                         | ECA | 84   | 4.0   | -2.5  | -6.5  | 87   | 15  | 160  |
| South Africa                   | AFR | 1185 | 1.1   | -8.0  | -9.1  | 1730 | 296 | 3165 |
| Sri Lanka                      | SAR | 339  | 3.5   | -4.6  | -8.1  | 441  | 75  | 806  |
| St. Lucia                      | LAC | 2    | 3.2   | -16.9 | -20.1 | 7    | 1   | 13   |
| St. Vincent and the Grenadines | LAC | 2    | 2.3   | -7.0  | -9.3  | 2    | 0   | 4    |
| Suriname                       | LAC | 11   | 2.5   | -13.1 | -15.6 | 27   | 5   | 49   |
| Thailand                       | EAP | 725  | 3.0   | -7.1  | -10.2 | 1183 | 202 | 2164 |
| Tonga                          | EAP | 3    | 3.7   | -2.5  | -6.2  | 3    | 0   | 5    |
| Turkey                         | ECA | 1318 | 3.0   | -5.0  | -8.0  | 1689 | 289 | 3089 |
| Turkmenistan                   | ECA | 139  | 6.0   | 1.8   | -4.3  | 95   | 16  | 174  |
| Venezuela, RB                  | LAC | 528  | -10.0 | -25.0 | -15.0 | 1273 | 218 | 2328 |

<sup>a</sup>The country classification into income and region groups follows the World Bank classification for fiscal year 2021. AFR = sub-Saharan Africa; EAP = East Asia and Pacific; ECA = European and Central Asia; LAC = Latin America and Caribbean; MNA = Middle East and North Africa SAR = South Asia;

<sup>b</sup>Number of births projected by the United Nations World Population Prospects 2019.

<sup>c</sup>Projections by the IMF World Economic Outlook for 2020.

# BMJ Open

**How many infants may have died in low- and middle-income countries in 2020 due to the economic contraction accompanying the COVID-19 pandemic? Mortality projections based on forecasted declines in economic growth**

|                                 |                                                                                                                                                |
|---------------------------------|------------------------------------------------------------------------------------------------------------------------------------------------|
| Journal:                        | <i>BMJ Open</i>                                                                                                                                |
| Manuscript ID                   | bmjopen-2021-050551.R2                                                                                                                         |
| Article Type:                   | Original research                                                                                                                              |
| Date Submitted by the Author:   | 17-Jul-2021                                                                                                                                    |
| Complete List of Authors:       | Shapira, Gil; World Bank, Development Research Group<br>de Walque, Damien; World Bank<br>Friedman, Jed; World Bank, Development Research Group |
| <b>Primary Subject Heading</b>: | Global health                                                                                                                                  |
| Secondary Subject Heading:      | Health policy                                                                                                                                  |
| Keywords:                       | COVID-19, HEALTH ECONOMICS, Health policy < HEALTH SERVICES ADMINISTRATION & MANAGEMENT                                                        |
|                                 |                                                                                                                                                |

SCHOLARONE™  
Manuscripts



I, the Submitting Author has the right to grant and does grant on behalf of all authors of the Work (as defined in the below author licence), an exclusive licence and/or a non-exclusive licence for contributions from authors who are: i) UK Crown employees; ii) where BMJ has agreed a CC-BY licence shall apply, and/or iii) in accordance with the terms applicable for US Federal Government officers or employees acting as part of their official duties; on a worldwide, perpetual, irrevocable, royalty-free basis to BMJ Publishing Group Ltd ("BMJ") its licensees and where the relevant Journal is co-owned by BMJ to the co-owners of the Journal, to publish the Work in this journal and any other BMJ products and to exploit all rights, as set out in our [licence](#).

The Submitting Author accepts and understands that any supply made under these terms is made by BMJ to the Submitting Author unless you are acting as an employee on behalf of your employer or a postgraduate student of an affiliated institution which is paying any applicable article publishing charge ("APC") for Open Access articles. Where the Submitting Author wishes to make the Work available on an Open Access basis (and intends to pay the relevant APC), the terms of reuse of such Open Access shall be governed by a Creative Commons licence – details of these licences and which [Creative Commons](#) licence will apply to this Work are set out in our licence referred to above.

Other than as permitted in any relevant BMJ Author's Self Archiving Policies, I confirm this Work has not been accepted for publication elsewhere, is not being considered for publication elsewhere and does not duplicate material already published. I confirm all authors consent to publication of this Work and authorise the granting of this licence.

# How many infants may have died in low- and middle-income countries in 2020 due to the economic contraction accompanying the COVID-19 pandemic? Mortality projections based on forecasted declines in economic growth

Gil Shapira, PhD. Development Research Group, World Bank. [gshapira@worldbank.org](mailto:gshapira@worldbank.org).

Damien de Walque, PhD. Development Research Group, World Bank.

Jed Friedman, PhD. Development Research Group, World Bank.

## Abstract

**Objectives:** While COVID-19 has a relatively small direct impact on infant mortality, the pandemic is expected to indirectly increase mortality of this vulnerable group in low- and middle-income countries through its effects on the economy and health system performance. Previous studies projected indirect mortality by modelling how hypothesized disruptions in health services will affect health outcomes. We provide alternative projections, relying on modelling the relationship between aggregate income shocks and mortality.

**Design:** We construct a sample of 5.2 million births by pooling retrospective birth histories reported by women in Demographic and Health Surveys conducted in 83 low- and middle-income countries between 1985 and 2018. We employ regression models with country-specific fixed-effects and flexible time trends to estimate the impact of GDP per capita on infant mortality rate. We then use growth projections by the International Monetary Fund to predict the effect of the economic downturn in 2020 on infant mortality.

**Results:** We estimate 267,208 (112,000-422,415) excess infant deaths in 128 countries, corresponding to a 6.8% (2.8%-10.7%) increase in the total number of infant deaths expected in 2020.

**Conclusions:** The findings underscore the vulnerability of infants to the negative income shocks such as those imposed by the COVID-19 pandemic. While efforts towards prevention and treatment of COVID-19 remain paramount, the global community should also strengthen social safety nets and assure continuity of essential health services.

## Strengths and limitations of this study

- Our study links GDP per capita data to an especially large dataset of 5.2 million retrospective birth histories reported in Demographic and Health Surveys (DHS) conducted in many low- and middle-income countries between 1985 and 2017.
- While previous projections of indirect COVID-19 mortality have been based on assumptions regarding the magnitude of health service disruptions, our estimates account for additional mechanisms, mainly increased household poverty.
- Our estimates may represent a lower bound of the actual excess mortality if the current economic downturn is accompanied by larger disruptions to the provision of essential health services relative to previous downturns.



- 1  
2  
3  
4  
5  
6  
7  
8  
9  
10  
11  
12  
13
- We estimate the short-term impact of GDP fluctuations on mortality while longer-term implications for mortality and other adverse outcomes may also arise.
  - The analysis ascribes the difference between October 2019 and October 2020 economic growth projections for 2020 solely to the pandemic, even though some countries have also experienced other shocks, such as natural disasters or political crises that may affect national income levels.

14  
15  
16  
17  
18  
19  
20  
21  
22  
23  
24  
25  
26  
27  
28  
29  
30  
31  
32  
33  
34  
35  
36  
37  
38  
39  
40  
41  
42  
43  
44  
45  
46  
47  
48  
49  
50  
51  
52  
53  
54  
55  
56  
57  
58  
59  
60

**Correspondence to:**

Dr Gil Shapira; gshapira@worldbank.org

## Introduction

Reducing mortality risk in the wake of the COVID-19 pandemic is a paramount public concern. While direct mortality risk as a result of COVID-19 infection has garnered the majority of attention in global media and policy discussions, indirect mortality may be substantial. Health and social policies should not lose sight of excess indirect mortality caused by such factors as the interruption of essential health services and the general economic downturn brought on by the pandemic. This study attempts to quantify the expected indirect mortality over the pandemic period for one especially vulnerable sub-population – infants – by modeling the impact of projected economic decline on the likelihood of infant survival.

Studies from diverse settings find negligible direct mortality rates for children and infants due to COVID-19 (1). However, stringent containment measures and the ensuing economic downturn, as well as the need to reallocate health system resources towards pandemic response, have influenced many social determinants of mortality such as the ability to afford nutritious foods and to access essential health care. Unlike economic crises in high income countries, which appear to lower mortality (2), economic crises in low-income countries generally increase mortality among vulnerable groups, namely young children and the elderly. Earlier studies have documented a robust relationship between short-term fluctuation in aggregate income and all-cause infant mortality in low- and middle-income countries (3) (4) (5) (6) (7) (8).

At the very start of the COVID-19 pandemic, modelling exercises predicted that the interruption of essential health services will be severe (9) (10) (11) (12) (13) (14) and perhaps the world will experience 250,000 to 1.15 million young child deaths (15) in the first six months of the pandemic. Recent studies indicate that barriers to access essential health care in low- and middle-income are not just a theoretical concern documenting, for example, disruptions in immunization services in Pakistan and Sierra Leone (16) (17), and access to primary care in sub-Saharan Africa (18) (19). At the same time, the global economy is expected to contract 4.9% in the first year of the pandemic (20) and the global poverty headcount is projected to increase by 120 million people (21). Based on historical data, this economic decline is likely to be associated with higher mortality in excess of COVID-19 fatalities (22), especially in developing economies, and will create food insecurity (23) and lower the affordability among vulnerable households of key goods and services necessary for child survival.

In this study, we estimate the impact of the economic downturn on infant mortality by modelling the relationship between GDP fluctuations and infant mortality, following the approach of Baird et al (2011) (5). We link GDP per capita data to 5.2 million retrospective birth histories reported in 83 Demographic and Health Surveys (DHS) conducted in low- and middle-income countries between 1985 and 2017. Then, we use growth projections by International Monetary Fund (IMF) World Economic Outlook (WEO) to predict the effect of the economic downturn in 2020 on infant mortality.

## Data and Methods

To estimate the impact of changes in aggregate income on infant mortality, we rely on two sources of data. Data on GDP per capita is taken from the World Development Indicators. We use values adjusted for purchasing power parity, corresponding to 2011 US dollars. Data on infant mortality are constructed from retrospective birth history reports in all Demographic and Health Surveys conducted in 83 low- and middle-income countries between 1985 and 2018. The surveys used in the analysis are listed in Table A1 in the appendix. The combined sample totals 5.2 million births, of which 27 and 55 percent are from low- and lower-middle income countries. Over the full period of analysis, the sample's infant mortality rate per 1000 births is 85, 61 and 37 for low-, lower-middle and upper-middle income countries respectively.

We estimate the relation between aggregate income change and infant mortality with the following framework:

$$D_{ict} = \alpha_c + \beta \log GDP_{ct} + \gamma_{1c} t_{ct} + \gamma_{2c} t_{ct}^2 + \gamma_{3c} t_{ct}^3 + \varepsilon_{ict}$$

$D_{ict}$  is a binary indicator taking the value 1 if child  $i$  in country  $c$  died in the first 12 months of life during year  $t$ .  $\log GDP$  is the natural logarithm of per capita GDP, and  $\varepsilon_{iact}$  is the error term. The  $\alpha$  and  $\gamma$  coefficients identify country-specific fixed effects and a country-specific cubic time trend, respectively. Standard errors are clustered at the country level.  $\beta$  is the coefficient of interest, describing the relationship between aggregate income shocks and infant mortality. We estimate this semi-elasticity of infant mortality to aggregate income decline separately by country income level, as classified by the World Bank 2020 income groups, as well as overall. Low-income economies are defined by a gross national income (GNI) per capita of less than 1,035 USD in 2019. Lower middle-income economies are defined by a GNI between 1,036 and 4,045 USD and the range for upper middle-income economies is between 4,046 and 12,535 USD. To explore the robustness of the findings, both we and Baird et al. (2011) (5) find appreciably similar results with linear or quadratic time trends, as well as alternative recall periods for births (5 or 15 years as opposed to the default 10 years).

As a projection of the aggregate income shock in each country, we compare growth predictions for the same calendar period made before and then during the pandemic. Specifically, we use the IMF WEO 2020 growth rates projected in October 2019 and in October 2020. We define the difference between the two projections as the growth shortfall that is likely attributed to the pandemic and the ensuing economic crisis. Between October 2019 and October 2020, the IMF revised downwards the growth projections for all countries. The average shortfall for lower- and middle-income countries is 9.3 percent. The average projected shortfall in low-income countries, 5.9 percent, is less than half of the projected average shortfall in upper-middle income countries, 12.5 percent.

To calculate the number of excess infant deaths that were likely caused by the pandemic in each country, we multiply the projected growth shortfalls with the  $\beta$  coefficient from the regression specification above. We then multiply by the projected number of births in each country, taken from the United Nation's World Population Prospects 2019. The total number of births are projected for the five-year period 2015-2020 and we assume equal proportion of births for each year. (The projections are available at [population.un.org/wpp](http://population.un.org/wpp).)

## Patient and Public Involvement

The study presents analysis of secondary data. There was no patient and public involvement.

## Results

### Estimation of the GDP-Mortality relationship

The regression coefficient estimates are presented in Table 1. A 1% decrease in GDP per capita is associated with a 0.23 increase in infant mortality per 1,000 children born in low- and middle-income countries. These estimates vary substantially by income group. A 1% decrease in per capita GDP is associated with increases of 0.48, 0.24 and 0.16 in infant mortality per 1,000 children born in low- lower-middle- and upper-middle-income countries, respectively.

Our estimate for the relationship between GDP and infant mortality is significantly lower than the estimate presented in Baird, Friedman and Schady (2011), using the same specification (5). This previous

analysis estimated that a 1% decrease in GDP per capita is associated with a 0.40 increase in infant mortality per 1000 children born in low- and middle-income countries. Two things might drive this difference. First, we have a different composition of countries given that more DHS datasets are available. Our analysis includes 83 countries relative to 59 in the earlier paper. Second, resiliency to income shocks may have improved over time through increased household incomes and more developed health systems.

## Projection of excess infant mortality in 2020

In Table 2, we report the estimated excess infant mortality in 128 low- and middle-income countries, along with 95% confidence interval around the estimate. The results by income group and region presented in Table 2 are aggregations of the country level projections presented in Appendix Table A2. In total, we estimate 267,208 (112,000-422,415) excess infant deaths in lower- and middle-income countries due to the growth shortfall in 2020. Most of the excess mortality is estimated to occur in the 46 lower-middle income countries, even though the income-mortality semi-elasticity in low-income countries (LIC) is almost twice the size of that in lower-middle income countries (LMIC). This is explained both by the fact that there are more countries and more populous countries in the LMIC group and because the IMF projects larger growth shortfalls in that group. It is worth noting that more than a third of the excess infant mortality is projected to be in India (99,642). India has the highest number of annual births (24,238,000) as well as a particularly large projected economic shortfall of -17.3%. Because of this, South Asia is the region with the highest expected excess infant mortality although there are only 8 countries included in the analysis. Nigeria and China are a distant second and third with projected excess infant deaths of 11,904 and 10,835.

To benchmark our projections of excess infant deaths, we assess the percentage increase in infant mortality these additional deaths represent. To that end, we calculate the expected infant mortality in the absence of the pandemic for the 128 countries. According to the World Bank's World Development Indicators, estimated infant mortality rates in low-, lower-middle, and upper-middle countries were 48, 37 and 11 deaths per 1000 live births in 2019. We multiply these rates by the annual number of births in each country to forecast a total of 3,953,466 deaths. Assuming that infant mortality rate in 2020 would have been similar to that in 2019 if the COVID-19 outbreak hasn't occurred, the excess deaths we project correspond to an increase of 6.8 (2.8-10.7) percent in the total number of expected infant deaths.

## Discussion

In this study, we have assessed the potential impact of the 2020 economic downturn caused by the COVID-19 pandemic on infant mortality – we estimate almost 270,000 excess infant deaths in the 12 months following the pandemic start. A useful comparison point to this estimate is the 28,000 to 50,000 excess infant deaths estimated for Africa after the financial crisis in 2009 (7). Our Africa estimate in 2020 is 82,239 (37,858-126,620) infant deaths. This higher projection reflects the larger estimated GDP shortfalls. Several mechanisms are likely driving this increase in mortality among children aged 0-1: impoverishment at the household level will lead to worse nutrition and care practices for infants and reduced ability to access health services, while the economic crisis might also affect the supply and quality of services offered by the health systems (19). It is difficult to compare our estimates with other projections focusing on health system disruption as the main driver as the methodology, the age ranges, and the time period are different. The most comparable study, with a focus on child mortality, predicts 253,500 to 1,157,000 additional under-5 child deaths over the first six months of the pandemic, depending on the scenario severity (15).

1  
2  
3 Our estimates of excess infant mortality are not additional to previous projections but serve as an  
4 alternative. Our reduced form approach yields estimates that already incorporate at least some  
5 consequences of reduced utilization of health services, i.e those reductions that have historically arose  
6 during severe economic downturns. Our estimates also directly account for other mechanisms, mainly  
7 increased poverty. As past economic crises were not driven by a pandemic, it is possible that the world  
8 will experience a higher indirect mortality shock than implied by the historic income-mortality semi-  
9 elasticity if the current economic downturn is accompanied by more severe disruptions to the supply of  
10 effective health services. Therefore, our projections may provide a lower bound of actual indirect  
11 mortality. On the other hand, the projections reported in this paper ascribe the difference between the  
12 WEO October 2019 and October 2020 economic growth projections for 2020 solely to the pandemic,  
13 even though some countries have also experienced other shocks, such as natural disasters or political  
14 crises.  
15

16  
17 Regarding limitations of the analysis, one refinement of our estimation approach would consider the  
18 relevant expenditure categories that directly determine the production of child health, rather than overall  
19 expenditure as captured in GDP. Relevant expenditure categories include public health sector spending,  
20 private spending on health and nutrition, foreign assistance in the form of health aid, and public and  
21 private spending on related sectors and services such as water and sanitation. It is these components of  
22 GDP that are more directly tied to child survival and would likely exhibit a more predictive relationship  
23 to infant mortality than overall GDP exhibits. Unfortunately, this more granular data does not exist in a  
24 systematic and standardized form for the countries and time periods considered, nor are there standard  
25 future projections of such components. Therefore, we follow the existent literature and explore the  
26 relation between a widespread summary measures of national economic output, GDP, and infant survival.  
27

28  
29 An extension of our approach may also consider country characteristics that likely mediate the GDP-  
30 mortality relation, including measures of economic inequality. Infant mortality in more unequal countries  
31 is likely more vulnerable to economic contractions. However, here again, we do not have the necessary  
32 annual data to easily include a summary inequality measure such as the Gini Coefficient within our  
33 estimation framework. The Demographic and Health Surveys allow us to construct annual birth and  
34 mortality indicators from retrospective reports of fertility yet do not include per capita consumption or  
35 wealth status for the same years. Standard cross-country datasets such as PovCalNet  
36 ([iresearch.worldbank.org/PovcalNet/index.htm](http://iresearch.worldbank.org/PovcalNet/index.htm)) update the national Gini coefficient only on a sporadic  
37 basis. For example the Gini estimate for India is only updated for the years 1987, 1993, 2004, 2009, and  
38 2011.  
39

40  
41 Another limitation of our analysis is that it relies on retrospective birth histories in Demographic and  
42 Health Surveys. In the absence of comprehensive and robust vital registration statistics in most of the  
43 countries included in this analysis, this is likely the most comprehensive data source available. However,  
44 such household survey data can be affected by recall bias, especially for birth and deaths occurring long  
45 before the survey date. For this reason, we have explored the stability of estimates to alternative birth  
46 recall periods and find appreciably similar results. Another limitation is that we only consider the short-  
47 term impact of GDP fluctuations on mortality while longer-term consequences might also exist. Longer-  
48 term impacts on the number of infant deaths could also occur through changes in fertility behavior but  
49 should not affect our projections for 2020. Although COVID-19 was first detected in the end of 2019, the  
50 outbreak was declared a pandemic only in March 2020. If there were impacts on fertility, they would  
51 impact births and infant mortality in 2021. Finally, economic contractions in high-income countries might  
52 reduce foreign aid to lower-income countries which in turn can increase mortality (24). If declining aid  
53  
54  
55  
56  
57  
58  
59

1  
2  
3 affects future GDP, our model does not account for such mechanisms as we assume that a country's infant  
4 mortality rate is only affected by its (own) contemporaneous GDP.  
5

6 Regarding the reported confidence intervals for projected excess infant deaths in Table 2, note that these  
7 bounds may be regarded as conservative. This is because we first apply the 5<sup>th</sup> percentile lower bound and  
8 then the 95<sup>th</sup> percentile upper bound estimate of the mortality semi-elasticity to the projected growth  
9 contractions for all countries in order to estimate the bounds. This exercise implicitly imposes a perfect  
10 correlation of semi-elasticities across countries. If instead, each country receives its own independent  
11 draw from the distribution of semi-elasticities then there will be significantly tighter confidence bounds,  
12 at least in expectation.  
13  
14

15 On the other hand, there may also be forecast error in either the country-level economic growth  
16 projections or in the projections of number of births. These potential errors are not directly modeled.  
17 Previous literature suggests these forecast errors have an expected mean of zero, with most deviations  
18 from forecast on the order of plus/minus one percentage point of economic growth or plus/minus three  
19 percent of total births (25) (26). To explore further the role of uncertainty in economic and demographic  
20 projections, we consider Monte Carlo simulations that model country-specific growth and birth  
21 projections with a slightly larger anticipated degree of error. Specifically, we simulate a draw for each  
22 country from growth projections that are uniformly distributed around the projection at +/- 1.5 percentage  
23 points and draws for the birth projection that are uniformly distributed around the projection at +/- 4  
24 percent. After 10,000 simulations we obtain a 95% CI of total excess deaths to be (251588, 283106).  
25 Substantially narrower than the reported CI of (112000, 422415). This suggests that uncertainty in the  
26 true value of the growth-IMR semi-elasticity is the most influential parameter driving uncertainty in the  
27 projected total number of indirect infant deaths.  
28  
29  
30

31 Regardless of the exact number of projected deaths, the large number of excess infant deaths estimated in  
32 our analysis underscores the vulnerability of this age group to negative aggregate income shocks such as  
33 those induced by the COVID-19 pandemic. While we focused on the 0-1 age group, our estimates are  
34 suggestive of other vulnerabilities not directly attributable to COVID-19 among other segments of the  
35 population such as children aged 1-5, pregnant women, and the elderly. As countries, health systems, and  
36 the wider global community continue efforts to prevent and treat COVID-19, we should also consider  
37 resources to stabilize health systems and strengthen social safety nets in order to mitigate the human,  
38 social, and economic consequences of the pandemic and related lockdown policies.  
39  
40  
41  
42  
43

## 44 **Declaration of interests**

45 We declare no competing interests.  
46

## 47 **Funding**

48 This study did not require funding.  
49

## 50 **Data availability**

51 Requests to access the data can be submitted on the Demographic and Health Surveys Program at  
52 dhsprogram.com.  
53  
54  
55  
56  
57  
58  
59  
60

### **Ethics Statement**

Ethics approval was not sought as the study presents results of an analysis of secondary data and does not involve human participants.

### **Contributor Statement**

DdW, JF and GS contributed to the conceptualization, design of the methodology and the writing. GS conducted the formal analysis and JF and GS validated the results.

### **Acknowledgments**

We gratefully acknowledge the excellent support provided by Salome Drouard as a research assistant. The findings, interpretations, and conclusions expressed in this paper are entirely those of the authors and do not necessarily represent the views of the World Bank, its executive directors, of the governments of

~~the countries they represent. Our findings, interpretations, and conclusions are those of the authors and do not necessarily represent the views of the World Bank, its executive directors, of the governments of the countries they represent.~~

## References

1. *Assessing the age specificity of infection fatality rates for COVID-19: systematic review, meta-analysis, and public policy implications.* **Levin, Andrew T., William P. Hanage, Nana Owusu-Boaitey, Kensington B. Cochran, Seamus P. Walsh, and Gideon Meyerowitz-Katz.** 2020, *European journal of epidemiology*, pp. 1-16.
2. *Health effects of economic crises.* **Ruhm, Christopher J.** 2016, *Health Economics*, pp. 6-24.
3. *Wealthier is Healthier.* **Pritchett, Lant, and Lawrence H. Summers.** 1996, *Journal of Human Resources*, pp. 841-868.
4. *Fatal fluctuations? Cyclicity in infant mortality in India.* **Bhalotra, Sonia.** 2010, *Journal of Development Economics*, pp. 7-19.
5. *Aggregate income shocks and infant mortality in the developing world.* **Baird, Sarah, Jed Friedman, and Norbert Schady.** 2011, *Review of Economics and statistics*, pp. 847-856.
6. *Economic crises, maternal and infant mortality, low birth weight and enrollment rates: evidence from Argentina's downturns.* **Cruces, Guillermo, Pablo Glüzmann, and Luis Felipe López Calva.** 2012, *World Development*, pp. 303-314.
7. *How many infants likely died in Africa as a result of the 2008–2009 global financial crisis?* **Friedman, Jed, and Norbert Schady.** 2013, *Health Economics*, pp. 611-622.
8. *Effects of economic downturns on child mortality: a global economic analysis, 1981–2010.* **Maruthappu, Mahiben, Robert A. Watson, Johnathan Watkins, Thomas Zeltner, Rosalind Raine, and Rifat Atun.** 2017, *BMJ global health*.
9. *Routine childhood immunisation during the COVID-19 pandemic in Africa: a benefit–risk analysis of health benefits versus excess risk of SARS-CoV-2 infection.* **Abbas, Kaja, Simon R. Procter, Kevin van Zandvoort, Andrew Clark, Sebastian Funk, Tewodaj Mengistu, Dan Hogan et al.** 10, 2020, *The Lancet Global Health*, Vol. 8, pp. e1264-e1272.
10. *Potential impact of the COVID-19 pandemic on HIV, tuberculosis, and malaria in low-income and middle-income countries: a modelling study.* **Hogan, Alexandra B., Britta L. Jewell, Ellie Sherrard-Smith, Juan F. Vesga, Oliver J. Watson, Charles Whittaker, Arran Hamlet et al.** 10, 2020, *The Lancet Global Health*, Vol. 8, pp. e1132-e1141.
11. *Potential effects of disruption to HIV programmes in sub-Saharan Africa caused by COVID-19: results from multiple mathematical models.* **Jewell, Britta L., Edinah Mudimu, John Stover, Debra Ten Brink, Andrew N. Phillips, Jennifer A. Smith, Rowan Martin-Hughes et al.** 9, 2020, *The Lancet HIV*, Vol. 7, pp. e629-e640.
12. *The potential public health consequences of COVID-19 on malaria in Africa.* **Sherrard-Smith, Ellie, Alexandra B. Hogan, Arran Hamlet, Oliver J. Watson, Charlie Whittaker, Peter Winskill, Fatima Ali et al.** 1, 2020, *Nature medicine*, Vol. 26, pp. 1411-1416.
13. **Organization, World Health.** *Pulse survey on continuity of essential health services during the COVID-19 pandemic.* 2020.



- 1  
2  
3 14. *The impact of the COVID-19 pandemic on maternal and perinatal health: a scoping review.* **Kotlar,**  
4 **Bethany, Emily Gerson, Sophia Petrillo, Ana Langer, and Henning Tiemeier.** 1, s.l. : Reproductive  
5 Health, 2021, Vol. 18.  
6
- 7 15. *Early estimates of the indirect effects of the COVID-19 pandemic on maternal and child mortality in*  
8 *low-income and middle-income countries: a modelling study.* **Roberton, Timothy, Emily D. Carter,**  
9 **Victoria B. Chou, Angela R. Stegmuller, Bianca D. Jackson, Yvonne Tam, Talata Sawadogo-Lewis,**  
10 **and Neff Walker.** 7, 2020, The Lancet Global Health, Vol. 8, pp. e901-e908.  
11
- 12 16. *Impact of COVID-19 pandemic response on uptake of routine immunizations in Sindh, Pakistan: an*  
13 *analysis of provincial electronic immunization registry data.* **Chandir, Subhash, Danya Arif Siddiqi,**  
14 **Mariam Mehmood, Hamidreza Setayesh, Muhammad Siddique, Amna Mirza, Riswana**  
15 **Soundardjee et al.** 45, 2020, Vaccine , Vol. 38, pp. 7146-7155.  
16
- 17 17. *Child healthcare and immunizations in sub-Saharan Africa during the COVID-19 pandemic.*  
18 **Buonsenso, Danilo, Bianca Cinicola, Memenatu Ngaima Kallon, and Francesco Iodice.** s.l. :  
19 Frontiers in Pediatrics, 2020, Frontiers in pediatrics, p. 517.  
20
- 21 18. *Access to primary healthcare during lockdown measures for COVID-19 in rural South Africa: an*  
22 *interrupted time series analysis.* **Siedner, Mark J., John D. Kraemer, Mark J. Meyer, Guy Harling,**  
23 **Thobeka Mngomezulu, Patrick Gabela, Siphephelo Dlamini et al.** 2020, BMJ open.  
24
- 25 19. *Disruptions in maternal and child health service utilization service utilization during COVID-19:*  
26 *analysis from eight sub-Saharan African countries.* **Shapira, Gil, et al.** s.l. : Health Policy and Planning,  
27 2021.  
28
- 29 20. **Fund, International Monetary.** *World Economic Outlook, October 2020: A Long and Difficult*  
30 *Ascent.* . 2020.  
31
- 32 21. **Christoph Lakner, Nishant Yonzandaniel Gerszon Mahlerr. Andres Castanesa and**  
33 **Aguilarhaoyu Wu.** Updated estimates of the impact of COVID-19 on global poverty: Looking back at  
34 2020 and the outlook for 2021.  
35
- 36 22. **Doerr, Sebastian, and Boris Hofmann.** *The recession-mortality nexus and Covid-19.* s.l. : Bank of  
37 International Settlements, 2020.  
38
- 39 23. *Falling living standards during the COVID-19 crisis: Quantitative evidence from nine developing*  
40 *countries.* **Dennis Egger, Edward Miguel, Shana S. Warren, Ashish Shenoy, Elliott Collins, Dean**  
41 **Karlan, Doug Parkerson, A. Mushfiq Mobarak, Günther Fink, Christopher Udry, Michael Walker,**  
42 **Johannes Haushofer, Magdalena Larreboire, Susan Athey, Paula Lopez-Pena, Salim B.** 6, 2021,  
43 Science Advances, Vol. 7.  
44
- 45 24. *COVID-19, economic impact and child mortality: A global concern.* **Kabir, Mahvish, Muhammad**  
46 **Arif Nadeem Saqib, Muhammad Zaid, Haroon Ahmed, and Muhammad Sohail Afzal.** 7, 2020,  
47 Clinical Nutrition, Vol. 37.  
48
- 49 25. *Forecasts in times of crises.* **Eicher, Theo S., David J. Kuenzel, Chris Papageorgiou, and Charis**  
50 **Christofides.** 3, s.l. : International Journal of Forecasting, 2019, Vol. 35.  
51
- 52 26. *Data quality and accuracy of United Nations population projections.* **Keilman, Nico.** 2, s.l. :  
53 Population Studies, Vol. 55.  
54  
55  
56  
57  
58  
59  
60

## Tables

**Table 1: Estimated relationship between aggregate income shocks and infant mortality rate per 1,000 children, by World Bank country income groups**

| Low-income countries | Lower-middle-income countries | Upper-middle-income countries | Low- and middle-income countries |
|----------------------|-------------------------------|-------------------------------|----------------------------------|
| -47.85***<br>(17.71) | -23.73***<br>(5.50)           | -16.08***<br>(6.80)           | -23.12***<br>(9.38)              |

Source: authors' estimation using data from Demographic and Health surveys and World Development Indicators  
 Notes: Overall number of observed births is 5,273,350. The table presents coefficient estimates from regressions of infant mortality log per capita GDP with time trends and country fixed effects. Standard errors are presented in parentheses. There are four income groupings for countries; the country income groups follow the World Bank classification for fiscal year 2021.  
 \* p<0.10, \*\* p<0.05, \*\*\* p<0.01.

**Table 2: Projected excess infant deaths with 95% confidence intervals, by World Bank country income groups and regions**

|                                 | Estimate | 95% CI            | Countries |
|---------------------------------|----------|-------------------|-----------|
| <b>Total</b>                    | 267,318  | 112,000 – 422,415 | 128       |
| <b>By income group:</b>         |          |                   |           |
| Low-income economies            | 65,628   | 18,013-113,241    | 29        |
| Lower-middle income economies   | 158,638  | 86,646-230,628    | 46        |
| Upper-middle income economies   | 42,942   | 7,340-78,544      | 53        |
| <b>By region:</b>               |          |                   |           |
| Sub-Saharan Africa              | 82,239   | 29,198-135,280    | 48        |
| East Asia and Pacific           | 32,537   | 12,899-52,174     | 19        |
| Europe and Central Asia         | 2,962    | 2,372-13,553      | 20        |
| Latin America and the Caribbean | 17,202   | 3,628-30,776      | 23        |
| Middle East and North Africa    | 14,127   | 4,067-24,187      | 10        |
| South Asia                      | 113,141  | 59,836-166,446    | 8         |

Source: authors' projections based on estimated parameters presented in Table 1 and data from IMF World Economic Outlook and World Population Prospects.

Notes: The definitions of income groups and regions are based on the World Bank country group categorization for the 2021 fiscal year.

**Appendix Table A1: Demographic and Health Surveys datasets used in the analysis**

| Low-income                              | Lower-middle income                                      | Upper-middle income                                         |
|-----------------------------------------|----------------------------------------------------------|-------------------------------------------------------------|
| Afghanistan 2015                        | Angola 2016                                              | Albania 2009, 2018                                          |
| Benin 1996, 2001, 2006, 2012, 2018      | Bangladesh 1994, 1997, 2000, 2004, 2007, 2011, 2014      | Armenia 2000, 2005, 2010, 2016                              |
| Burkina Faso 1993, 1999, 2003, 2010     | Bolivia 1989, 1994, 1998, 2004, 2008                     | Azerbaijan 2006                                             |
| Burundi 1987, 2011, 2017                | Cambodia 2000, 2006, 2011, 2014                          | Brazil 1986, 1992, 1996                                     |
| Central African Republic 1995           | Cameroon 1991, 1998, 2004, 2011, 2018                    | Colombia 1986, 1990, 1995, 2000, 2005, 2010, 2016           |
| DRC 2007, 2014                          | Comoros 1996, 2012                                       | Dominican Republic 1986, 1991, 1996, 1999, 2002, 2007, 2013 |
| Ethiopia 2000, 2005, 2011, 2016         | Republic of Congo 2005, 2012                             | Ecuador 1987                                                |
| Gambia 2013                             | Cote d'Ivoire 1994, 1999, 2012                           | Gabon 2001, 2012                                            |
| Guinea 1999, 2005, 2012, 2018           | Egypt 1989, 1993, 1996, 2003, 2005, 2008, 2014           | Guatemala 1987, 1995, 1999, 2015                            |
| Haiti 1995, 2000, 2006, 2012, 2017      | El Salvador 1985                                         | Guyana 2009                                                 |
| Liberia 2007, 2013                      | Eswatini 2007                                            | Jordan 1990, 1997, 2002, 2007, 2012, 2018                   |
| Madagascar 1992, 1997, 2004, 2009       | Ghana 1988, 1994, 2003, 2008, 2014                       | Kazakhstan 1995, 1999                                       |
| Malawi 1992, 2000, 2005, 2010, 2016     | Honduras 2006, 2012                                      | Maldives 2009, 2017                                         |
| Mali 1987, 1996, 2001, 2006, 2013, 2018 | India 1993, 1999, 2006, 2016                             | Mexico 1987                                                 |
| Mozambique 1997, 2004, 2011, 2015       | Indonesia 1987, 1991, 1994, 1997, 2003, 2007, 2012, 2017 | Namibia 1992, 2000, 2007, 2013                              |
| Nepal 1997, 2001, 2006, 2011, 2017      | Kenya 1989, 1993, 1998, 2003, 2009, 2014                 | Paraguay 1990                                               |
| Niger 1992, 1998, 2006, 2012            | Kyrgyz Republic 1997, 2012                               | Peru 1986, 1992, 1996, 2000, 2004-2012*                     |
| Rwanda 1992, 2000, 2008, 2011, 2015     | Lesotho 2005, 2010, 2014                                 |                                                             |
| Sierra Leone 2008, 2013                 | Moldova 2005                                             |                                                             |
| Tajikistan 2012, 2017                   | Morocco 1987, 1992, 2004                                 |                                                             |
| Tanzania 1999, 2005, 2012, 2016         | Myanmar 2016                                             |                                                             |
| Togo 1988, 1998, 2014                   | Nicaragua 1998, 2001                                     |                                                             |
| Uganda 1989, 1995, 2001, 2006           | Nigeria 1990, 2003, 2008, 2013, 2018                     |                                                             |
| Yemen 1992, 2013                        | Pakistan 1991, 2007, 2013, 2018                          |                                                             |
|                                         | Papua New Guinea 2018                                    |                                                             |
|                                         | Philippines 1993, 1998, 2003, 2008, 2013, 2017           |                                                             |
|                                         | Sao Tome and Principe 2009                               |                                                             |
|                                         | Senegal 1986, 1993, 1997, 2011, 2012-2018*               |                                                             |
|                                         | Sudan 1990                                               |                                                             |
|                                         | Timor Leste 2010, 2016                                   |                                                             |
|                                         | Tunisia 1988                                             |                                                             |
|                                         | Ukraine 2007                                             |                                                             |
|                                         | Uzbekistan 1996                                          |                                                             |
|                                         | Vietnam 1997, 2002                                       |                                                             |
|                                         | Zambia 1992, 1997, 2002, 2007, 2014, 2018                |                                                             |
|                                         | Zimbabwe 1989, 1994, 1999, 2006, 2011, 2015              |                                                             |

Notes: The years denote the timing of survey implementation in each country. Some surveys spanned over more than one calendar year. In these cases, the last year of the survey is indicated. For the analysis, retrospective birth histories are used to create birth and infant mortality data for the 11 years preceding each survey.

\* Senegal and Peru had special continuous surveys. Peru had annual survey between 2004 and 2012 and Senegal completed annual surveys between 2012 to 2018.

Appendix Table A2: Projections of growth shortfall and excess infant mortality in lower- and middle-income countries

| Country                                             | Region <sup>a</sup> | Number of annual birth 2015-2020 (in thousands) <sup>b</sup> | WEO projections of 2020 growth <sup>c</sup> |                         |                  | Excess mortality projection |                 |                  |
|-----------------------------------------------------|---------------------|--------------------------------------------------------------|---------------------------------------------|-------------------------|------------------|-----------------------------|-----------------|------------------|
|                                                     |                     |                                                              | October 2019 projection                     | October 2020 projection | Growth Shortfall | estimate                    | 95% lower bound | 95% higher bound |
| <b>Panel A: Lower Income Economies <sup>a</sup></b> |                     |                                                              |                                             |                         |                  |                             |                 |                  |
| Afghanistan                                         | SAR                 | 1205                                                         | 3.5                                         | -5.0                    | -8.5             | 4888                        | 1342            | 8434             |
| Benin                                               | AFR                 | 413                                                          | 6.7                                         | 2.0                     | -4.7             | 930                         | 255             | 1604             |
| Burkina Faso                                        | AFR                 | 745                                                          | 6.0                                         | -2.0                    | -8.0             | 2852                        | 783             | 4920             |
| Burundi                                             | AFR                 | 433                                                          | 0.5                                         | -3.2                    | -3.7             | 775                         | 213             | 1338             |
| Central African Republic                            | AFR                 | 165                                                          | 5.0                                         | -1.0                    | -5.9             | 468                         | 128             | 807              |
| Chad                                                | AFR                 | 648                                                          | 5.4                                         | -0.7                    | -6.1             | 1894                        | 520             | 3267             |
| Congo, Dem. Rep.                                    | AFR                 | 3434                                                         | 3.9                                         | -2.2                    | -6.0             | 9925                        | 2724            | 17126            |
| Eritrea                                             | AFR                 | 106                                                          | 3.9                                         | -0.6                    | -4.5             | 226                         | 62              | 391              |
| Ethiopia                                            | AFR                 | 3514                                                         | 7.2                                         | 1.9                     | -5.3             | 8832                        | 2424            | 15240            |
| Gambia, The                                         | AFR                 | 87                                                           | 6.4                                         | -1.8                    | -8.2             | 343                         | 94              | 591              |
| Guinea                                              | AFR                 | 449                                                          | 6.0                                         | 1.4                     | -4.5             | 970                         | 266             | 1673             |
| Guinea-Bissau                                       | AFR                 | 66                                                           | 4.9                                         | -2.9                    | -7.8             | 245                         | 67              | 422              |
| Haiti                                               | LAC                 | 271                                                          | 1.2                                         | -4.0                    | -5.2             | 674                         | 185             | 1164             |
| Liberia                                             | AFR                 | 158                                                          | 1.6                                         | -3.0                    | -4.6             | 345                         | 95              | 596              |
| Madagascar                                          | AFR                 | 852                                                          | 5.3                                         | -3.2                    | -8.5             | 3454                        | 948             | 5960             |
| Malawi                                              | AFR                 | 614                                                          | 5.1                                         | 0.6                     | -4.5             | 1323                        | 363             | 2283             |
| Mali                                                | AFR                 | 787                                                          | 5.0                                         | -2.0                    | -7.0             | 2631                        | 722             | 4540             |
| Mozambique                                          | AFR                 | 1099                                                         | 6.0                                         | -0.5                    | -6.5             | 3441                        | 944             | 5937             |
| Nepal                                               | SAR                 | 562                                                          | 6.3                                         | 0.0                     | -6.3             | 1681                        | 461             | 2900             |
| Niger                                               | AFR                 | 1023                                                         | 6.1                                         | 0.5                     | -5.6             | 2717                        | 746             | 4688             |
| Rwanda                                              | AFR                 | 390                                                          | 8.1                                         | 2.0                     | -6.1             | 1142                        | 313             | 1970             |
| Sierra Leone                                        | AFR                 | 255                                                          | 4.7                                         | -3.1                    | -7.7             | 945                         | 260             | 1631             |
| Somalia                                             | AFR                 | 622                                                          | 3.2                                         | -1.5                    | -4.7             | 1398                        | 384             | 2412             |
| South Sudan                                         | AFR                 | 386                                                          | 8.2                                         | 4.1                     | -4.1             | 757                         | 208             | 1306             |
| Tajikistan                                          | ECA                 | 281                                                          | 4.5                                         | 1.0                     | -3.5             | 470                         | 129             | 811              |
| Tanzania                                            | AFR                 | 2052                                                         | 5.7                                         | 1.9                     | -3.8             | 3732                        | 1024            | 6440             |
| Togo                                                | AFR                 | 260                                                          | 5.3                                         | 0.0                     | -5.3             | 659                         | 181             | 1137             |
| Uganda                                              | AFR                 | 1614                                                         | 6.2                                         | -0.3                    | -6.5             | 5022                        | 1378            | 8666             |
| Yemen, Rep.                                         | MNA                 | 865                                                          | 2.0                                         | -5.0                    | -7.0             | 2890                        | 793             | 4987             |

| <b>Panel B: Lower-Middle Income Economies <sup>a</sup></b> |     |       |      |       |       |       |       |        |
|------------------------------------------------------------|-----|-------|------|-------|-------|-------|-------|--------|
| Angola                                                     | AFR | 1243  | 1.2  | -4.0  | -5.2  | 1523  | 832   | 2215   |
| Bangladesh                                                 | SAR | 2946  | 7.4  | 3.8   | -3.6  | 2550  | 1393  | 3707   |
| Bhutan                                                     | SAR | 13    | 7.2  | 0.6   | -6.6  | 21    | 11    | 30     |
| Bolivia                                                    | LAC | 247   | 3.8  | -7.9  | -11.7 | 685   | 374   | 996    |
| Cabo Verde                                                 | AFR | 11    | 5.0  | -6.8  | -11.7 | 30    | 16    | 43     |
| Cambodia                                                   | EAP | 366   | 6.8  | -2.8  | -9.5  | 828   | 452   | 1204   |
| Cameroon                                                   | AFR | 887   | 4.2  | -2.8  | -6.9  | 1461  | 798   | 2124   |
| Comoros                                                    | AFR | 26    | 4.2  | -1.8  | -6.1  | 38    | 21    | 55     |
| Congo, Rep.                                                | AFR | 171   | 2.8  | -7.0  | -9.8  | 398   | 217   | 578    |
| Côte d'Ivoire                                              | AFR | 890   | 7.3  | 1.8   | -5.5  | 1161  | 634   | 1688   |
| Djibouti                                                   | AFR | 21    | 6.0  | -1.0  | -7.0  | 34    | 19    | 50     |
| Egypt                                                      | MNA | 2584  | 5.9  | 3.5   | -2.3  | 1424  | 778   | 2070   |
| El Salvador                                                | LAC | 118   | 2.3  | -9.0  | -11.3 | 315   | 172   | 458    |
| Eswatini                                                   | AFR | 30    | 0.5  | -3.5  | -4.0  | 29    | 16    | 41     |
| Ghana                                                      | AFR | 871   | 5.6  | 0.9   | -4.7  | 968   | 529   | 1407   |
| Honduras                                                   | LAC | 207   | 3.5  | -6.6  | -10.1 | 496   | 271   | 721    |
| India                                                      | SAR | 24238 | 7.0  | -10.3 | -17.3 | 99642 | 54424 | 144860 |
| Indonesia                                                  | EAP | 4842  | 5.1  | -1.5  | -6.6  | 7549  | 4123  | 10975  |
| Kenya                                                      | AFR | 1469  | 6.0  | 1.0   | -5.0  | 1743  | 952   | 2533   |
| Kiribati                                                   | EAP | 3     | 2.3  | -1.1  | -3.4  | 3     | 1     | 4      |
| Kyrgyz Republic                                            | ECA | 155   | 3.4  | -12.0 | -15.4 | 566   | 309   | 823    |
| Lao PDR                                                    | EAP | 167   | 6.5  | 0.2   | -6.3  | 250   | 136   | 363    |
| Lesotho                                                    | AFR | 57    | -0.2 | -4.8  | -4.6  | 62    | 34    | 91     |
| Mauritania                                                 | AFR | 147   | 5.9  | -3.2  | -9.1  | 318   | 174   | 463    |
| Micronesia, Fed. Sts.                                      | EAP | 3     | 0.8  | -3.8  | -4.6  | 3     | 2     | 4      |
| Moldova                                                    | ECA | 41    | 3.8  | -4.5  | -8.3  | 81    | 44    | 118    |
| Mongolia                                                   | EAP | 77    | 5.4  | -2.0  | -7.4  | 134   | 73    | 195    |
| Morocco                                                    | MNA | 682   | 3.7  | -7.0  | -10.7 | 1725  | 942   | 2508   |
| Myanmar                                                    | EAP | 948   | 6.3  | 2.0   | -4.3  | 959   | 524   | 1395   |
| Nicaragua                                                  | LAC | 134   | -0.8 | -5.5  | -4.7  | 151   | 82    | 219    |
| Nigeria                                                    | AFR | 7377  | 2.5  | -4.3  | -6.8  | 11904 | 6502  | 17306  |
| Pakistan                                                   | SAR | 5994  | 2.4  | -0.4  | -2.7  | 3891  | 2125  | 5656   |
| Papua New Guinea                                           | EAP | 232   | 2.6  | -3.3  | -5.8  | 322   | 176   | 468    |
| Philippines                                                | EAP | 2178  | 6.2  | -8.3  | -14.4 | 7466  | 4078  | 10855  |

|    |                                                            |     |      |      |       |       |       |      |      |
|----|------------------------------------------------------------|-----|------|------|-------|-------|-------|------|------|
| 1  |                                                            |     |      |      |       |       |       |      |      |
| 2  |                                                            |     |      |      |       |       |       |      |      |
| 3  |                                                            |     |      |      |       |       |       |      |      |
| 4  | Senegal                                                    | AFR | 544  | 6.8  | -0.7  | -7.4  | 961   | 525  | 1397 |
| 5  | Solomon Islands                                            | EAP | 21   | 2.9  | -5.0  | -7.9  | 39    | 21   | 57   |
| 6  | Sudan                                                      | AFR | 1339 | -1.5 | -8.4  | -6.9  | 2182  | 1192 | 3172 |
| 7  | São Tomé and Príncipe                                      | AFR | 7    | 3.5  | -6.5  | -10.0 | 16    | 9    | 23   |
| 8  | Timor-Leste                                                | EAP | 37   | 5.0  | -6.8  | -11.8 | 105   | 57   | 152  |
| 9  | Tunisia                                                    | MNA | 204  | 2.4  | -7.0  | -9.5  | 458   | 250  | 666  |
| 10 | Ukraine                                                    | ECA | 426  | 3.0  | -7.2  | -10.2 | 1032  | 564  | 1500 |
| 11 | Uzbekistan                                                 | ECA | 703  | 6.0  | 0.7   | -5.3  | 884   | 483  | 1285 |
| 12 | Vanuatu                                                    | EAP | 9    | 3.1  | -8.3  | -11.4 | 23    | 13   | 34   |
| 13 | Vietnam                                                    | EAP | 1610 | 6.5  | 1.6   | -4.9  | 1872  | 1023 | 2722 |
| 14 | Zambia                                                     | AFR | 622  | 1.7  | -4.8  | -6.5  | 963   | 526  | 1400 |
| 15 | Zimbabwe                                                   | AFR | 442  | 2.7  | -10.4 | -13.1 | 1375  | 751  | 1999 |
| 16 | Nigeria                                                    | AFR | 7377 | 2.5  | -4.3  | -6.8  | 11904 | 832  | 2215 |
| 17 | Pakistan                                                   | SAR | 5994 | 2.4  | -0.4  | -2.7  | 3891  | 1393 | 3707 |
| 18 | Papua New Guinea                                           | EAP | 232  | 2.6  | -3.3  | -5.8  | 322   | 11   | 30   |
| 19 | Philippines                                                | EAP | 2178 | 6.2  | -8.3  | -14.4 | 7466  | 374  | 996  |
| 20 | Senegal                                                    | AFR | 544  | 6.8  | -0.7  | -7.4  | 961   | 16   | 43   |
| 21 | Solomon Islands                                            | EAP | 21   | 2.9  | -5.0  | -7.9  | 39    | 452  | 1204 |
| 22 | Sudan                                                      | AFR | 1339 | -1.5 | -8.4  | -6.9  | 2182  | 798  | 2124 |
| 23 | São Tomé and Príncipe                                      | AFR | 7    | 3.5  | -6.5  | -10.0 | 16    | 21   | 55   |
| 24 | Timor-Leste                                                | EAP | 37   | 5.0  | -6.8  | -11.8 | 105   | 217  | 578  |
| 25 | Tunisia                                                    | MNA | 204  | 2.4  | -7.0  | -9.5  | 458   | 634  | 1688 |
| 26 | Ukraine                                                    | ECA | 426  | 3.0  | -7.2  | -10.2 | 1032  | 19   | 50   |
| 27 | Uzbekistan                                                 | ECA | 703  | 6.0  | 0.7   | -5.3  | 884   | 778  | 2070 |
| 28 | Vanuatu                                                    | EAP | 9    | 3.1  | -8.3  | -11.4 | 23    | 172  | 458  |
| 29 | Vietnam                                                    | EAP | 1610 | 6.5  | 1.6   | -4.9  | 1872  | 16   | 41   |
| 30 | Zambia                                                     | AFR | 622  | 1.7  | -4.8  | -6.5  | 963   | 529  | 1407 |
| 31 | Zimbabwe                                                   | AFR | 442  | 2.7  | -10.4 | -13.1 | 1375  | 271  | 721  |
| 32 |                                                            |     |      |      |       |       |       |      |      |
| 33 |                                                            |     |      |      |       |       |       |      |      |
| 34 | <b>Panel C: Upper-Middle Income Economies <sup>a</sup></b> |     |      |      |       |       |       |      |      |
| 35 | Albania                                                    | ECA | 34   | 4.0  | -7.5  | -11.6 | 63    | 11   | 116  |
| 36 | Algeria                                                    | MNA | 1032 | 2.4  | -5.5  | -7.9  | 1305  | 223  | 2388 |
| 37 | Argentina                                                  | LAC | 755  | -1.3 | -11.8 | -10.5 | 1276  | 218  | 2333 |
| 38 | Armenia                                                    | ECA | 42   | 4.8  | -4.5  | -9.3  | 62    | 11   | 114  |
| 39 | Azerbaijan                                                 | ECA | 169  | 2.1  | -4.0  | -6.1  | 167   | 28   | 305  |
| 40 | Belarus                                                    | ECA | 112  | 0.3  | -3.0  | -3.3  | 59    | 10   | 108  |
| 41 |                                                            |     |      |      |       |       |       |      |      |
| 42 |                                                            |     |      |      |       |       |       |      |      |
| 43 |                                                            |     |      |      |       |       |       |      |      |
| 44 |                                                            |     |      |      |       |       |       |      |      |
| 45 |                                                            |     |      |      |       |       |       |      |      |
| 46 |                                                            |     |      |      |       |       |       |      |      |
| 47 |                                                            |     |      |      |       |       |       |      |      |

|    |                        |     |       |      |       |       |       |      |       |
|----|------------------------|-----|-------|------|-------|-------|-------|------|-------|
| 1  |                        |     |       |      |       |       |       |      |       |
| 2  |                        |     |       |      |       |       |       |      |       |
| 3  |                        |     |       |      |       |       |       |      |       |
| 4  |                        |     |       |      |       |       |       |      |       |
| 5  |                        |     |       |      |       |       |       |      |       |
| 6  |                        |     |       |      |       |       |       |      |       |
| 7  |                        |     |       |      |       |       |       |      |       |
| 8  |                        |     |       |      |       |       |       |      |       |
| 9  |                        |     |       |      |       |       |       |      |       |
| 10 |                        |     |       |      |       |       |       |      |       |
| 11 |                        |     |       |      |       |       |       |      |       |
| 12 |                        |     |       |      |       |       |       |      |       |
| 13 |                        |     |       |      |       |       |       |      |       |
| 14 |                        |     |       |      |       |       |       |      |       |
| 15 |                        |     |       |      |       |       |       |      |       |
| 16 |                        |     |       |      |       |       |       |      |       |
| 17 |                        |     |       |      |       |       |       |      |       |
| 18 |                        |     |       |      |       |       |       |      |       |
| 19 |                        |     |       |      |       |       |       |      |       |
| 20 |                        |     |       |      |       |       |       |      |       |
| 21 |                        |     |       |      |       |       |       |      |       |
| 22 |                        |     |       |      |       |       |       |      |       |
| 23 |                        |     |       |      |       |       |       |      |       |
| 24 |                        |     |       |      |       |       |       |      |       |
| 25 |                        |     |       |      |       |       |       |      |       |
| 26 |                        |     |       |      |       |       |       |      |       |
| 27 |                        |     |       |      |       |       |       |      |       |
| 28 |                        |     |       |      |       |       |       |      |       |
| 29 |                        |     |       |      |       |       |       |      |       |
| 30 |                        |     |       |      |       |       |       |      |       |
| 31 |                        |     |       |      |       |       |       |      |       |
| 32 |                        |     |       |      |       |       |       |      |       |
| 33 |                        |     |       |      |       |       |       |      |       |
| 34 |                        |     |       |      |       |       |       |      |       |
| 35 |                        |     |       |      |       |       |       |      |       |
| 36 |                        |     |       |      |       |       |       |      |       |
| 37 |                        |     |       |      |       |       |       |      |       |
| 38 |                        |     |       |      |       |       |       |      |       |
| 39 |                        |     |       |      |       |       |       |      |       |
| 40 |                        |     |       |      |       |       |       |      |       |
| 41 |                        |     |       |      |       |       |       |      |       |
| 42 |                        |     |       |      |       |       |       |      |       |
| 43 |                        |     |       |      |       |       |       |      |       |
| 44 |                        |     |       |      |       |       |       |      |       |
| 45 |                        |     |       |      |       |       |       |      |       |
| 46 |                        |     |       |      |       |       |       |      |       |
| 47 |                        |     |       |      |       |       |       |      |       |
|    | Belize                 | LAC | 8     | 2.1  | -16.0 | -18.1 | 23    | 4    | 42    |
|    | Bosnia and Herzegovina | ECA | 27    | 2.6  | -6.5  | -9.1  | 40    | 7    | 74    |
|    | Botswana               | AFR | 56    | 4.3  | -9.6  | -14.0 | 126   | 22   | 231   |
|    | Brazil                 | LAC | 2934  | 2.0  | -5.8  | -7.8  | 3700  | 632  | 6768  |
|    | Bulgaria               | ECA | 63    | 3.2  | -4.0  | -7.2  | 73    | 13   | 134   |
|    | China                  | EAP | 16978 | 5.8  | 1.9   | -4.0  | 10835 | 1852 | 19818 |
|    | Colombia               | LAC | 739   | 3.6  | -8.2  | -11.8 | 1407  | 240  | 2573  |
|    | Costa Rica             | LAC | 70    | 2.5  | -5.5  | -8.0  | 91    | 15   | 166   |
|    | Dominican Republic     | LAC | 208   | 5.2  | -6.0  | -11.2 | 375   | 64   | 686   |
|    | Ecuador                | LAC | 336   | 0.5  | -11.0 | -11.5 | 621   | 106  | 1135  |
|    | Equatorial Guinea      | AFR | 43    | -5.0 | -6.0  | -1.0  | 7     | 1    | 13    |
|    | Fiji                   | EAP | 19    | 3.0  | -21.0 | -24.0 | 73    | 13   | 134   |
|    | Gabon                  | AFR | 67    | 3.4  | -2.7  | -6.1  | 65    | 11   | 120   |
|    | Georgia                | ECA | 54    | 4.8  | -5.0  | -9.8  | 86    | 15   | 157   |
|    | Grenada                | LAC | 2     | 2.7  | -11.8 | -14.5 | 4     | 1    | 8     |
|    | Guatemala              | LAC | 423   | 3.5  | -2.0  | -5.5  | 377   | 64   | 690   |
|    | Guyana                 | LAC | 16    | 85.6 | 26.2  | -59.4 | 149   | 25   | 273   |
|    | Iran                   | MNA | 1552  | 0.0  | -5.0  | -5.0  | 1257  | 215  | 2298  |
|    | Iraq                   | MNA | 1104  | 4.7  | -12.1 | -16.7 | 2972  | 508  | 5436  |
|    | Jamaica                | LAC | 47    | 1.0  | -8.6  | -9.6  | 73    | 13   | 134   |
|    | Jordan                 | MNA | 215   | 2.4  | -5.0  | -7.4  | 255   | 44   | 467   |
|    | Kazakhstan             | ECA | 389   | 3.9  | -2.7  | -6.6  | 413   | 71   | 756   |
|    | Lebanon                | MNA | 117   | 0.9  | -25.0 | -25.9 | 488   | 83   | 893   |
|    | Libya                  | MNA | 126   | 0.0  | -66.7 | -66.6 | 1353  | 231  | 2475  |
|    | Malaysia               | EAP | 527   | 4.4  | -6.0  | -10.4 | 882   | 151  | 1613  |
|    | Maldives               | SAR | 7     | 6.0  | -18.6 | -24.6 | 28    | 5    | 52    |
|    | Mauritius              | AFR | 13    | 3.8  | -14.2 | -18.0 | 38    | 6    | 69    |
|    | Mexico                 | LAC | 2224  | 1.3  | -9.0  | -10.3 | 3670  | 627  | 6713  |
|    | Montenegro             | ECA | 7     | 2.5  | -12.0 | -14.5 | 17    | 3    | 32    |
|    | Namibia                | AFR | 70    | 1.6  | -5.9  | -7.4  | 83    | 14   | 153   |
|    | North Macedonia        | ECA | 23    | 3.4  | -5.4  | -8.8  | 32    | 5    | 58    |
|    | Paraguay               | LAC | 143   | 4.0  | -4.0  | -8.0  | 185   | 32   | 338   |
|    | Peru                   | LAC | 574   | 3.6  | -13.9 | -17.6 | 1621  | 277  | 2966  |
|    | Romania                | ECA | 192   | 3.5  | -4.8  | -8.3  | 256   | 44   | 468   |
|    | Russia                 | ECA | 1858  | 1.9  | -4.1  | -6.0  | 1788  | 306  | 3271  |

|                                |     |      |       |       |       |      |     |      |
|--------------------------------|-----|------|-------|-------|-------|------|-----|------|
| Samoa                          | EAP | 5    | 4.4   | -5.0  | -9.4  | 7    | 1   | 13   |
| Serbia                         | ECA | 84   | 4.0   | -2.5  | -6.5  | 87   | 15  | 160  |
| South Africa                   | AFR | 1185 | 1.1   | -8.0  | -9.1  | 1730 | 296 | 3165 |
| Sri Lanka                      | SAR | 339  | 3.5   | -4.6  | -8.1  | 441  | 75  | 806  |
| St. Lucia                      | LAC | 2    | 3.2   | -16.9 | -20.1 | 7    | 1   | 13   |
| St. Vincent and the Grenadines | LAC | 2    | 2.3   | -7.0  | -9.3  | 2    | 0   | 4    |
| Suriname                       | LAC | 11   | 2.5   | -13.1 | -15.6 | 27   | 5   | 49   |
| Thailand                       | EAP | 725  | 3.0   | -7.1  | -10.2 | 1183 | 202 | 2164 |
| Tonga                          | EAP | 3    | 3.7   | -2.5  | -6.2  | 3    | 0   | 5    |
| Turkey                         | ECA | 1318 | 3.0   | -5.0  | -8.0  | 1689 | 289 | 3089 |
| Turkmenistan                   | ECA | 139  | 6.0   | 1.8   | -4.3  | 95   | 16  | 174  |
| Venezuela, RB                  | LAC | 528  | -10.0 | -25.0 | -15.0 | 1273 | 218 | 2328 |

<sup>a</sup>The country classification into income and region groups follows the World Bank classification for fiscal year 2021. AFR = sub-Saharan Africa; EAP = East Asia and Pacific; ECA = European and Central Asia; LAC = Latin America and Caribbean; MNA = Middle East and North Africa SAR = South Asia;

<sup>b</sup>Number of births projected by the United Nations World Population Prospects 2019.

<sup>c</sup>Projections by the IMF World Economic Outlook for 2020.
