# Supplementary material for: How many infants may have died in low-income and middle-income countries in 2020 due to the economic contraction accompanying the COVID-19 pandemic? Mortality projections based on forecasted declines in economic growth
Source: HighWire-hosted journal article supplement (doi:10.1136/bmjopen-2021-050551), 2021-08-01
Supplement: bmjopen-2021-050551supp001_data_supplement.pdf [file bmjopen-2021-050551supp001_data_supplement.pdf]

**Appendix Table A1: Demographic and Health Surveys datasets used in the analysis**

| Low-income                              | Lower-middle income                                      | Upper-middle income                                         |
|-----------------------------------------|----------------------------------------------------------|-------------------------------------------------------------|
| Afghanistan 2015                        | Angola 2016                                              | Albania 2009, 2018                                          |
| Benin 1996, 2001, 2006, 2012, 2018      | Bangladesh 1994, 1997, 2000, 2004, 2007, 2011, 2014      | Armenia 2000, 2005, 2010, 2016                              |
| Burkina Faso 1993, 1999, 2003, 2010     | Bolivia 1989, 1994, 1998, 2004, 2008                     | Azerbaijan 2006                                             |
| Burundi 1987, 2011, 2017                | Cambodia 2000, 2006, 2011, 2014                          | Brazil 1986, 1992, 1996                                     |
| Central African Republic 1995           | Cameroon 1991, 1998, 2004, 2011, 2018                    | Colombia 1986, 1990, 1995, 2000, 2005, 2010, 2016           |
| DRC 2007, 2014                          | Comoros 1996, 2012                                       | Dominican Republic 1986, 1991, 1996, 1999, 2002, 2007, 2013 |
| Ethiopia 2000, 2005, 2011, 2016         | Republic of Congo 2005, 2012                             | Ecuador 1987                                                |
| Gambia 2013                             | Cote d'Ivoire 1994, 1999, 2012                           | Gabon 2001, 2012                                            |
| Guinea 1999, 2005, 2012, 2018           | Egypt 1989, 1993, 1996, 2003, 2005, 2008, 2014           | Guatemala 1987, 1995, 1999, 2015                            |
| Haiti 1995, 2000, 2006, 2012, 2017      | El Salvador 1985                                         | Guyana 2009                                                 |
| Liberia 2007, 2013                      | Eswatini 2007                                            | Jordan 1990, 1997, 2002, 2007, 2012, 2018                   |
| Madagascar 1992, 1997, 2004, 2009       | Ghana 1988, 1994, 2003, 2008, 2014                       | Kazakhstan 1995, 1999                                       |
| Malawi 1992, 2000, 2005, 2010, 2016     | Honduras 2006, 2012                                      | Maldives 2009, 2017                                         |
| Mali 1987, 1996, 2001, 2006, 2013, 2018 | India 1993, 1999, 2006, 2016                             | Mexico 1987                                                 |
| Mozambique 1997, 2004, 2011, 2015       | Indonesia 1987, 1991, 1994, 1997, 2003, 2007, 2012, 2017 | Namibia 1992, 2000, 2007, 2013                              |
| Nepal 1997, 2001, 2006, 2011, 2017      | Kenya 1989, 1993, 1998, 2003, 2009, 2014                 | Paraguay 1990                                               |
| Niger 1992, 1998, 2006, 2012            | Kyrgyz Republic 1997, 2012                               | Peru 1986, 1992, 1996, 2000, 2004-2012*                     |
| Rwanda 1992, 2000, 2008, 2011, 2015     | Lesotho 2005, 2010, 2014                                 |                                                             |
| Sierra Leone 2008, 2013                 | Moldova 2005                                             |                                                             |
| Tajikistan 2012, 2017                   | Morocco 1987, 1992, 2004                                 |                                                             |
| Tanzania 1999, 2005, 2012, 2016         | Myanmar 2016                                             |                                                             |
| Togo 1988, 1998, 2014                   | Nicaragua 1998, 2001                                     |                                                             |
| Uganda 1989, 1995, 2001, 2006           | Nigeria 1990, 2003, 2008, 2013, 2018                     |                                                             |
| Yemen 1992, 2013                        | Pakistan 1991, 2007, 2013, 2018                          |                                                             |
|                                         | Papua New Guinea 2018                                    |                                                             |
|                                         | Philippines 1993, 1998, 2003, 2008, 2013, 2017           |                                                             |
|                                         | Sao Tome and Principe 2009                               |                                                             |
|                                         | Senegal 1986, 1993, 1997, 2011, 2012-2018*               |                                                             |
|                                         | Sudan 1990                                               |                                                             |
|                                         | Timor Leste 2010, 2016                                   |                                                             |
|                                         | Tunisia 1988                                             |                                                             |
|                                         | Ukraine 2007                                             |                                                             |
|                                         | Uzbekistan 1996                                          |                                                             |
|                                         | Vietnam 1997, 2002                                       |                                                             |
|                                         | Zambia 1992, 1997, 2002, 2007, 2014, 2018                |                                                             |
|                                         | Zimbabwe 1989, 1994, 1999, 2006, 2011, 2015              |                                                             |

Notes: The years denote the timing of survey implementation in each country. Some surveys spanned over more than one calendar year. In these cases, the last year of the survey is indicated. For the analysis, retrospective birth histories are used to create birth and infant mortality data for the 11 years preceding each survey.

\* Senegal and Peru had special continuous surveys. Peru had annual survey between 2004 and 2012 and Senegal completed annual surveys between 2012 to 2018.

Appendix Table A2: Projections of growth shortfall and excess infant mortality in lower- and middle-income countries

| Country                                             | Region <sup>a</sup> | Number of annual birth 2015-2020 (in thousands) <sup>b</sup> | WEO projections of 2020 growth <sup>c</sup> |                         |                  | Excess mortality projection |                 |                  |
|-----------------------------------------------------|---------------------|--------------------------------------------------------------|---------------------------------------------|-------------------------|------------------|-----------------------------|-----------------|------------------|
|                                                     |                     |                                                              | October 2019 projection                     | October 2020 projection | Growth Shortfall | estimate                    | 95% lower bound | 95% higher bound |
| <b>Panel A: Lower Income Economies <sup>a</sup></b> |                     |                                                              |                                             |                         |                  |                             |                 |                  |
| Afghanistan                                         | SAR                 | 1205                                                         | 3.5                                         | -5.0                    | -8.5             | 4888                        | 1342            | 8434             |
| Benin                                               | AFR                 | 413                                                          | 6.7                                         | 2.0                     | -4.7             | 930                         | 255             | 1604             |
| Burkina Faso                                        | AFR                 | 745                                                          | 6.0                                         | -2.0                    | -8.0             | 2852                        | 783             | 4920             |
| Burundi                                             | AFR                 | 433                                                          | 0.5                                         | -3.2                    | -3.7             | 775                         | 213             | 1338             |
| Central African Republic                            | AFR                 | 165                                                          | 5.0                                         | -1.0                    | -5.9             | 468                         | 128             | 807              |
| Chad                                                | AFR                 | 648                                                          | 5.4                                         | -0.7                    | -6.1             | 1894                        | 520             | 3267             |
| Congo, Dem. Rep.                                    | AFR                 | 3434                                                         | 3.9                                         | -2.2                    | -6.0             | 9925                        | 2724            | 17126            |
| Eritrea                                             | AFR                 | 106                                                          | 3.9                                         | -0.6                    | -4.5             | 226                         | 62              | 391              |
| Ethiopia                                            | AFR                 | 3514                                                         | 7.2                                         | 1.9                     | -5.3             | 8832                        | 2424            | 15240            |
| Gambia, The                                         | AFR                 | 87                                                           | 6.4                                         | -1.8                    | -8.2             | 343                         | 94              | 591              |
| Guinea                                              | AFR                 | 449                                                          | 6.0                                         | 1.4                     | -4.5             | 970                         | 266             | 1673             |
| Guinea-Bissau                                       | AFR                 | 66                                                           | 4.9                                         | -2.9                    | -7.8             | 245                         | 67              | 422              |
| Haiti                                               | LAC                 | 271                                                          | 1.2                                         | -4.0                    | -5.2             | 674                         | 185             | 1164             |
| Liberia                                             | AFR                 | 158                                                          | 1.6                                         | -3.0                    | -4.6             | 345                         | 95              | 596              |
| Madagascar                                          | AFR                 | 852                                                          | 5.3                                         | -3.2                    | -8.5             | 3454                        | 948             | 5960             |
| Malawi                                              | AFR                 | 614                                                          | 5.1                                         | 0.6                     | -4.5             | 1323                        | 363             | 2283             |
| Mali                                                | AFR                 | 787                                                          | 5.0                                         | -2.0                    | -7.0             | 2631                        | 722             | 4540             |
| Mozambique                                          | AFR                 | 1099                                                         | 6.0                                         | -0.5                    | -6.5             | 3441                        | 944             | 5937             |
| Nepal                                               | SAR                 | 562                                                          | 6.3                                         | 0.0                     | -6.3             | 1681                        | 461             | 2900             |
| Niger                                               | AFR                 | 1023                                                         | 6.1                                         | 0.5                     | -5.6             | 2717                        | 746             | 4688             |
| Rwanda                                              | AFR                 | 390                                                          | 8.1                                         | 2.0                     | -6.1             | 1142                        | 313             | 1970             |
| Sierra Leone                                        | AFR                 | 255                                                          | 4.7                                         | -3.1                    | -7.7             | 945                         | 260             | 1631             |
| Somalia                                             | AFR                 | 622                                                          | 3.2                                         | -1.5                    | -4.7             | 1398                        | 384             | 2412             |
| South Sudan                                         | AFR                 | 386                                                          | 8.2                                         | 4.1                     | -4.1             | 757                         | 208             | 1306             |
| Tajikistan                                          | ECA                 | 281                                                          | 4.5                                         | 1.0                     | -3.5             | 470                         | 129             | 811              |
| Tanzania                                            | AFR                 | 2052                                                         | 5.7                                         | 1.9                     | -3.8             | 3732                        | 1024            | 6440             |
| Togo                                                | AFR                 | 260                                                          | 5.3                                         | 0.0                     | -5.3             | 659                         | 181             | 1137             |
| Uganda                                              | AFR                 | 1614                                                         | 6.2                                         | -0.3                    | -6.5             | 5022                        | 1378            | 8666             |
| Yemen, Rep.                                         | MNA                 | 865                                                          | 2.0                                         | -5.0                    | -7.0             | 2890                        | 793             | 4987             |

| <b>Panel B: Lower-Middle Income Economies <sup>a</sup></b> |     |       |      |       |       |       |       |        |
|------------------------------------------------------------|-----|-------|------|-------|-------|-------|-------|--------|
| Angola                                                     | AFR | 1243  | 1.2  | -4.0  | -5.2  | 1523  | 832   | 2215   |
| Bangladesh                                                 | SAR | 2946  | 7.4  | 3.8   | -3.6  | 2550  | 1393  | 3707   |
| Bhutan                                                     | SAR | 13    | 7.2  | 0.6   | -6.6  | 21    | 11    | 30     |
| Bolivia                                                    | LAC | 247   | 3.8  | -7.9  | -11.7 | 685   | 374   | 996    |
| Cabo Verde                                                 | AFR | 11    | 5.0  | -6.8  | -11.7 | 30    | 16    | 43     |
| Cambodia                                                   | EAP | 366   | 6.8  | -2.8  | -9.5  | 828   | 452   | 1204   |
| Cameroon                                                   | AFR | 887   | 4.2  | -2.8  | -6.9  | 1461  | 798   | 2124   |
| Comoros                                                    | AFR | 26    | 4.2  | -1.8  | -6.1  | 38    | 21    | 55     |
| Congo, Rep.                                                | AFR | 171   | 2.8  | -7.0  | -9.8  | 398   | 217   | 578    |
| Côte d'Ivoire                                              | AFR | 890   | 7.3  | 1.8   | -5.5  | 1161  | 634   | 1688   |
| Djibouti                                                   | AFR | 21    | 6.0  | -1.0  | -7.0  | 34    | 19    | 50     |
| Egypt                                                      | MNA | 2584  | 5.9  | 3.5   | -2.3  | 1424  | 778   | 2070   |
| El Salvador                                                | LAC | 118   | 2.3  | -9.0  | -11.3 | 315   | 172   | 458    |
| Eswatini                                                   | AFR | 30    | 0.5  | -3.5  | -4.0  | 29    | 16    | 41     |
| Ghana                                                      | AFR | 871   | 5.6  | 0.9   | -4.7  | 968   | 529   | 1407   |
| Honduras                                                   | LAC | 207   | 3.5  | -6.6  | -10.1 | 496   | 271   | 721    |
| India                                                      | SAR | 24238 | 7.0  | -10.3 | -17.3 | 99642 | 54424 | 144860 |
| Indonesia                                                  | EAP | 4842  | 5.1  | -1.5  | -6.6  | 7549  | 4123  | 10975  |
| Kenya                                                      | AFR | 1469  | 6.0  | 1.0   | -5.0  | 1743  | 952   | 2533   |
| Kiribati                                                   | EAP | 3     | 2.3  | -1.1  | -3.4  | 3     | 1     | 4      |
| Kyrgyz Republic                                            | ECA | 155   | 3.4  | -12.0 | -15.4 | 566   | 309   | 823    |
| Lao PDR                                                    | EAP | 167   | 6.5  | 0.2   | -6.3  | 250   | 136   | 363    |
| Lesotho                                                    | AFR | 57    | -0.2 | -4.8  | -4.6  | 62    | 34    | 91     |
| Mauritania                                                 | AFR | 147   | 5.9  | -3.2  | -9.1  | 318   | 174   | 463    |
| Micronesia, Fed. Sts.                                      | EAP | 3     | 0.8  | -3.8  | -4.6  | 3     | 2     | 4      |
| Moldova                                                    | ECA | 41    | 3.8  | -4.5  | -8.3  | 81    | 44    | 118    |
| Mongolia                                                   | EAP | 77    | 5.4  | -2.0  | -7.4  | 134   | 73    | 195    |
| Morocco                                                    | MNA | 682   | 3.7  | -7.0  | -10.7 | 1725  | 942   | 2508   |
| Myanmar                                                    | EAP | 948   | 6.3  | 2.0   | -4.3  | 959   | 524   | 1395   |
| Nicaragua                                                  | LAC | 134   | -0.8 | -5.5  | -4.7  | 151   | 82    | 219    |
| Nigeria                                                    | AFR | 7377  | 2.5  | -4.3  | -6.8  | 11904 | 6502  | 17306  |
| Pakistan                                                   | SAR | 5994  | 2.4  | -0.4  | -2.7  | 3891  | 2125  | 5656   |
| Papua New Guinea                                           | EAP | 232   | 2.6  | -3.3  | -5.8  | 322   | 176   | 468    |
| Philippines                                                | EAP | 2178  | 6.2  | -8.3  | -14.4 | 7466  | 4078  | 10855  |

|                                                            |     |      |      |       |       |       |      |      |
|------------------------------------------------------------|-----|------|------|-------|-------|-------|------|------|
| Senegal                                                    | AFR | 544  | 6.8  | -0.7  | -7.4  | 961   | 525  | 1397 |
| Solomon Islands                                            | EAP | 21   | 2.9  | -5.0  | -7.9  | 39    | 21   | 57   |
| Sudan                                                      | AFR | 1339 | -1.5 | -8.4  | -6.9  | 2182  | 1192 | 3172 |
| São Tomé and Príncipe                                      | AFR | 7    | 3.5  | -6.5  | -10.0 | 16    | 9    | 23   |
| Timor-Leste                                                | EAP | 37   | 5.0  | -6.8  | -11.8 | 105   | 57   | 152  |
| Tunisia                                                    | MNA | 204  | 2.4  | -7.0  | -9.5  | 458   | 250  | 666  |
| Ukraine                                                    | ECA | 426  | 3.0  | -7.2  | -10.2 | 1032  | 564  | 1500 |
| Uzbekistan                                                 | ECA | 703  | 6.0  | 0.7   | -5.3  | 884   | 483  | 1285 |
| Vanuatu                                                    | EAP | 9    | 3.1  | -8.3  | -11.4 | 23    | 13   | 34   |
| Vietnam                                                    | EAP | 1610 | 6.5  | 1.6   | -4.9  | 1872  | 1023 | 2722 |
| Zambia                                                     | AFR | 622  | 1.7  | -4.8  | -6.5  | 963   | 526  | 1400 |
| Zimbabwe                                                   | AFR | 442  | 2.7  | -10.4 | -13.1 | 1375  | 751  | 1999 |
| Nigeria                                                    | AFR | 7377 | 2.5  | -4.3  | -6.8  | 11904 | 832  | 2215 |
| Pakistan                                                   | SAR | 5994 | 2.4  | -0.4  | -2.7  | 3891  | 1393 | 3707 |
| Papua New Guinea                                           | EAP | 232  | 2.6  | -3.3  | -5.8  | 322   | 11   | 30   |
| Philippines                                                | EAP | 2178 | 6.2  | -8.3  | -14.4 | 7466  | 374  | 996  |
| Senegal                                                    | AFR | 544  | 6.8  | -0.7  | -7.4  | 961   | 16   | 43   |
| Solomon Islands                                            | EAP | 21   | 2.9  | -5.0  | -7.9  | 39    | 452  | 1204 |
| Sudan                                                      | AFR | 1339 | -1.5 | -8.4  | -6.9  | 2182  | 798  | 2124 |
| São Tomé and Príncipe                                      | AFR | 7    | 3.5  | -6.5  | -10.0 | 16    | 21   | 55   |
| Timor-Leste                                                | EAP | 37   | 5.0  | -6.8  | -11.8 | 105   | 217  | 578  |
| Tunisia                                                    | MNA | 204  | 2.4  | -7.0  | -9.5  | 458   | 634  | 1688 |
| Ukraine                                                    | ECA | 426  | 3.0  | -7.2  | -10.2 | 1032  | 19   | 50   |
| Uzbekistan                                                 | ECA | 703  | 6.0  | 0.7   | -5.3  | 884   | 778  | 2070 |
| Vanuatu                                                    | EAP | 9    | 3.1  | -8.3  | -11.4 | 23    | 172  | 458  |
| Vietnam                                                    | EAP | 1610 | 6.5  | 1.6   | -4.9  | 1872  | 16   | 41   |
| Zambia                                                     | AFR | 622  | 1.7  | -4.8  | -6.5  | 963   | 529  | 1407 |
| Zimbabwe                                                   | AFR | 442  | 2.7  | -10.4 | -13.1 | 1375  | 271  | 721  |
| <b>Panel C: Upper-Middle Income Economies <sup>a</sup></b> |     |      |      |       |       |       |      |      |
| Albania                                                    | ECA | 34   | 4.0  | -7.5  | -11.6 | 63    | 11   | 116  |
| Algeria                                                    | MNA | 1032 | 2.4  | -5.5  | -7.9  | 1305  | 223  | 2388 |
| Argentina                                                  | LAC | 755  | -1.3 | -11.8 | -10.5 | 1276  | 218  | 2333 |
| Armenia                                                    | ECA | 42   | 4.8  | -4.5  | -9.3  | 62    | 11   | 114  |
| Azerbaijan                                                 | ECA | 169  | 2.1  | -4.0  | -6.1  | 167   | 28   | 305  |
| Belarus                                                    | ECA | 112  | 0.3  | -3.0  | -3.3  | 59    | 10   | 108  |

|                        |     |       |      |       |       |       |      |       |
|------------------------|-----|-------|------|-------|-------|-------|------|-------|
| Belize                 | LAC | 8     | 2.1  | -16.0 | -18.1 | 23    | 4    | 42    |
| Bosnia and Herzegovina | ECA | 27    | 2.6  | -6.5  | -9.1  | 40    | 7    | 74    |
| Botswana               | AFR | 56    | 4.3  | -9.6  | -14.0 | 126   | 22   | 231   |
| Brazil                 | LAC | 2934  | 2.0  | -5.8  | -7.8  | 3700  | 632  | 6768  |
| Bulgaria               | ECA | 63    | 3.2  | -4.0  | -7.2  | 73    | 13   | 134   |
| China                  | EAP | 16978 | 5.8  | 1.9   | -4.0  | 10835 | 1852 | 19818 |
| Colombia               | LAC | 739   | 3.6  | -8.2  | -11.8 | 1407  | 240  | 2573  |
| Costa Rica             | LAC | 70    | 2.5  | -5.5  | -8.0  | 91    | 15   | 166   |
| Dominican Republic     | LAC | 208   | 5.2  | -6.0  | -11.2 | 375   | 64   | 686   |
| Ecuador                | LAC | 336   | 0.5  | -11.0 | -11.5 | 621   | 106  | 1135  |
| Equatorial Guinea      | AFR | 43    | -5.0 | -6.0  | -1.0  | 7     | 1    | 13    |
| Fiji                   | EAP | 19    | 3.0  | -21.0 | -24.0 | 73    | 13   | 134   |
| Gabon                  | AFR | 67    | 3.4  | -2.7  | -6.1  | 65    | 11   | 120   |
| Georgia                | ECA | 54    | 4.8  | -5.0  | -9.8  | 86    | 15   | 157   |
| Grenada                | LAC | 2     | 2.7  | -11.8 | -14.5 | 4     | 1    | 8     |
| Guatemala              | LAC | 423   | 3.5  | -2.0  | -5.5  | 377   | 64   | 690   |
| Guyana                 | LAC | 16    | 85.6 | 26.2  | -59.4 | 149   | 25   | 273   |
| Iran                   | MNA | 1552  | 0.0  | -5.0  | -5.0  | 1257  | 215  | 2298  |
| Iraq                   | MNA | 1104  | 4.7  | -12.1 | -16.7 | 2972  | 508  | 5436  |
| Jamaica                | LAC | 47    | 1.0  | -8.6  | -9.6  | 73    | 13   | 134   |
| Jordan                 | MNA | 215   | 2.4  | -5.0  | -7.4  | 255   | 44   | 467   |
| Kazakhstan             | ECA | 389   | 3.9  | -2.7  | -6.6  | 413   | 71   | 756   |
| Lebanon                | MNA | 117   | 0.9  | -25.0 | -25.9 | 488   | 83   | 893   |
| Libya                  | MNA | 126   | 0.0  | -66.7 | -66.6 | 1353  | 231  | 2475  |
| Malaysia               | EAP | 527   | 4.4  | -6.0  | -10.4 | 882   | 151  | 1613  |
| Maldives               | SAR | 7     | 6.0  | -18.6 | -24.6 | 28    | 5    | 52    |
| Mauritius              | AFR | 13    | 3.8  | -14.2 | -18.0 | 38    | 6    | 69    |
| Mexico                 | LAC | 2224  | 1.3  | -9.0  | -10.3 | 3670  | 627  | 6713  |
| Montenegro             | ECA | 7     | 2.5  | -12.0 | -14.5 | 17    | 3    | 32    |
| Namibia                | AFR | 70    | 1.6  | -5.9  | -7.4  | 83    | 14   | 153   |
| North Macedonia        | ECA | 23    | 3.4  | -5.4  | -8.8  | 32    | 5    | 58    |
| Paraguay               | LAC | 143   | 4.0  | -4.0  | -8.0  | 185   | 32   | 338   |
| Peru                   | LAC | 574   | 3.6  | -13.9 | -17.6 | 1621  | 277  | 2966  |
| Romania                | ECA | 192   | 3.5  | -4.8  | -8.3  | 256   | 44   | 468   |
| Russia                 | ECA | 1858  | 1.9  | -4.1  | -6.0  | 1788  | 306  | 3271  |

|                                |     |      |       |       |       |      |     |      |
|--------------------------------|-----|------|-------|-------|-------|------|-----|------|
| Samoa                          | EAP | 5    | 4.4   | -5.0  | -9.4  | 7    | 1   | 13   |
| Serbia                         | ECA | 84   | 4.0   | -2.5  | -6.5  | 87   | 15  | 160  |
| South Africa                   | AFR | 1185 | 1.1   | -8.0  | -9.1  | 1730 | 296 | 3165 |
| Sri Lanka                      | SAR | 339  | 3.5   | -4.6  | -8.1  | 441  | 75  | 806  |
| St. Lucia                      | LAC | 2    | 3.2   | -16.9 | -20.1 | 7    | 1   | 13   |
| St. Vincent and the Grenadines | LAC | 2    | 2.3   | -7.0  | -9.3  | 2    | 0   | 4    |
| Suriname                       | LAC | 11   | 2.5   | -13.1 | -15.6 | 27   | 5   | 49   |
| Thailand                       | EAP | 725  | 3.0   | -7.1  | -10.2 | 1183 | 202 | 2164 |
| Tonga                          | EAP | 3    | 3.7   | -2.5  | -6.2  | 3    | 0   | 5    |
| Turkey                         | ECA | 1318 | 3.0   | -5.0  | -8.0  | 1689 | 289 | 3089 |
| Turkmenistan                   | ECA | 139  | 6.0   | 1.8   | -4.3  | 95   | 16  | 174  |
| Venezuela, RB                  | LAC | 528  | -10.0 | -25.0 | -15.0 | 1273 | 218 | 2328 |

<sup>a</sup>The country classification into income and region groups follows the World Bank classification for fiscal year 2021. AFR = sub-Saharan Africa; EAP = East Asia and Pacific; ECA = European and Central Asia; LAC = Latin America and Caribbean; MNA = Middle East and North Africa SAR = South Asia;

<sup>b</sup>Number of births projected by the United Nations World Population Prospects 2019.

<sup>c</sup>Projections by the IMF World Economic Outlook for 2020.
